# Supplementary material
Source: PubMed Central journal article supplement (PMC7557272)

# Global Impact of Coronavirus Disease 2019 Infection Requiring Admission to the ICU

A Systematic Review and Meta-analysis

*Elinor Tan, MBBS; Jialu Song, MD; Adam M. Deane, PhD; and Mark P. Plummer, PhD*

CHEST 2021; 159(2):524-536

*Online supplements are not copyedited prior to posting and the author(s) take full responsibility for the accuracy of all data.*

© 2020 AMERICAN COLLEGE OF CHEST PHYSICIANS. Reproduction of this article is prohibited without written permission from the American College of Chest Physicians. See online for more details. DOI: 10.1016/j.chest.2020.10.014

e-Appendix 1. Systematic Review protocols and Meta-analysis guidelines

e-Appendix 1A. PRISMA checklist

| Section/topic                      | #  | Checklist item                                                                                                                                                                                                                                                                                              | Reported on page #  |
|------------------------------------|----|-------------------------------------------------------------------------------------------------------------------------------------------------------------------------------------------------------------------------------------------------------------------------------------------------------------|---------------------|
| <b>TITLE</b>                       |    |                                                                                                                                                                                                                                                                                                             |                     |
| Title                              | 1  | Identify the report as a systematic review, meta-analysis, or both.                                                                                                                                                                                                                                         | 1                   |
| <b>ABSTRACT</b>                    |    |                                                                                                                                                                                                                                                                                                             |                     |
| Structured summary                 | 2  | Provide a structured summary including, as applicable: background; objectives; data sources; study eligibility criteria, participants, and interventions; study appraisal and synthesis methods; results; limitations; conclusions and implications of key findings; systematic review registration number. | 1                   |
| <b>INTRODUCTION</b>                |    |                                                                                                                                                                                                                                                                                                             |                     |
| Rationale                          | 3  | Describe the rationale for the review in the context of what is already known.                                                                                                                                                                                                                              | 2                   |
| Objectives                         | 4  | Provide an explicit statement of questions being addressed with reference to participants, interventions, comparisons, outcomes, and study design (PICOS).                                                                                                                                                  | 2                   |
| <b>METHODS</b>                     |    |                                                                                                                                                                                                                                                                                                             |                     |
| Protocol and registration          | 5  | Indicate if a review protocol exists, if and where it can be accessed (e.g., Web address), and, if available, provide registration information including registration number.                                                                                                                               | 2<br>e-Appendix 1   |
| Eligibility criteria               | 6  | Specify study characteristics (e.g., PICOS, length of follow-up) and report characteristics (e.g., years considered, language, publication status) used as criteria for eligibility, giving rationale.                                                                                                      | 2,3                 |
| Information sources                | 7  | Describe all information sources (e.g., databases with dates of coverage, contact with study authors to identify additional studies) in the search and date last searched.                                                                                                                                  | 2,3                 |
| Search                             | 8  | Present full electronic search strategy for at least one database, including any limits used, such that it could be repeated.                                                                                                                                                                               | 2,3<br>e-Appendix 2 |
| Study selection                    | 9  | State the process for selecting studies (i.e., screening, eligibility, included in systematic review, and, if applicable, included in the meta-analysis).                                                                                                                                                   | 2,3<br>Figure 1     |
| Data collection process            | 10 | Describe method of data extraction from reports (e.g., piloted forms, independently, in duplicate) and any processes for obtaining and confirming data from investigators.                                                                                                                                  | 3                   |
| Data items                         | 11 | List and define all variables for which data were sought (e.g., PICOS, funding sources) and any assumptions and simplifications made.                                                                                                                                                                       | 3                   |
| Risk of bias in individual studies | 12 | Describe methods used for assessing risk of bias of individual studies (including specification of whether this was done at the study or outcome level), and how this information is to be used                                                                                                             | 3                   |

|                      |    |                                                                                                                                                           |     |
|----------------------|----|-----------------------------------------------------------------------------------------------------------------------------------------------------------|-----|
|                      |    | in any data synthesis.                                                                                                                                    |     |
| Summary measures     | 13 | State the principal summary measures (e.g., risk ratio, difference in means).                                                                             | 3,4 |
| Synthesis of results | 14 | Describe the methods of handling data and combining results of studies, if done, including measures of consistency (e.g., $I^2$ ) for each meta-analysis. | 4   |

e-Appendix 1B. MOOSE checklist

| Item No                                     | Recommendation                                                                                                 | Reported on Page No           |
|---------------------------------------------|----------------------------------------------------------------------------------------------------------------|-------------------------------|
| Reporting of background should include      |                                                                                                                |                               |
| 1                                           | Problem definition                                                                                             | 1-2                           |
| 2                                           | Hypothesis statement                                                                                           | -                             |
| 3                                           | Description of study outcome(s)                                                                                | 6                             |
| 4                                           | Type of exposure or intervention used                                                                          | 2                             |
| 5                                           | Type of study designs used                                                                                     | 2-3<br>Table 1                |
| 6                                           | Study population                                                                                               | 3                             |
| Reporting of search strategy should include |                                                                                                                |                               |
| 7                                           | Qualifications of searchers (eg, librarians and investigators)                                                 | 3                             |
| 8                                           | Search strategy, including time period included in the synthesis and key words                                 | 2-3<br>e-Appendix 2           |
| 9                                           | Effort to include all available studies, including contact with authors                                        | 3                             |
| 10                                          | Databases and registries searched                                                                              | 2                             |
| 11                                          | Search software used, name and version, including special features used (eg, explosion)                        | e-Appendix 2                  |
| 12                                          | Use of hand searching (eg, reference lists of obtained articles)                                               | 3<br>Figure 1                 |
| 13                                          | List of citations located and those excluded, including justification                                          | 3<br>Figure 1<br>e-Appendix 3 |
| 14                                          | Method of addressing articles published in languages other than English                                        | -                             |
| 15                                          | Method of handling abstracts and unpublished studies                                                           | 3                             |
| 16                                          | Description of any contact with authors                                                                        | 3                             |
| Reporting of methods should include         |                                                                                                                |                               |
| 17                                          | Description of relevance or appropriateness of studies assembled for assessing the hypothesis to be tested     | 3<br>Table 1                  |
| 18                                          | Rationale for the selection and coding of data (eg, sound clinical principles or convenience)                  | 3                             |
| 19                                          | Documentation of how data were classified and coded (eg, multiple raters, blinding and interrater reliability) | 3                             |

|                                     |                                                                                                                                                                                                                                                                              |                                              |
|-------------------------------------|------------------------------------------------------------------------------------------------------------------------------------------------------------------------------------------------------------------------------------------------------------------------------|----------------------------------------------|
| 20                                  | Assessment of confounding (eg, comparability of cases and controls in studies where appropriate)                                                                                                                                                                             | 3-4                                          |
| 21                                  | Assessment of study quality, including blinding of quality assessors, stratification or regression on possible predictors of study results                                                                                                                                   | 3<br>Table 1<br>e-Appendix 4                 |
| 22                                  | Assessment of heterogeneity                                                                                                                                                                                                                                                  | 4                                            |
| 23                                  | Description of statistical methods (eg, complete description of fixed or random effects models, justification of whether the chosen models account for predictors of study results, dose-response models, or cumulative meta-analysis) in sufficient detail to be replicated | 4                                            |
| 24                                  | Provision of appropriate tables and graphics                                                                                                                                                                                                                                 | Figures 1-3<br>Tables 1-2<br>e-Appendix 5-14 |
| Reporting of results should include |                                                                                                                                                                                                                                                                              |                                              |
| 25                                  | Graphic summarizing individual study estimates and overall estimate                                                                                                                                                                                                          | Table 2                                      |
| 26                                  | Table giving descriptive information for each study included                                                                                                                                                                                                                 | Table 1<br>e-Appendix 4                      |
| 27                                  | Results of sensitivity testing (eg, subgroup analysis)                                                                                                                                                                                                                       | 6<br>Appendix 14                             |
| 28                                  | Indication of statistical uncertainty of findings                                                                                                                                                                                                                            | 6-9                                          |

| Item No                                 | Recommendation                                                                                                            | Reported on Page No |
|-----------------------------------------|---------------------------------------------------------------------------------------------------------------------------|---------------------|
| Reporting of discussion should include  |                                                                                                                           |                     |
| 29                                      | Quantitative assessment of bias (eg, publication bias)                                                                    | e-Appendix 13       |
| 30                                      | Justification for exclusion (eg, exclusion of non-English language citations)                                             | -                   |
| 31                                      | Assessment of quality of included studies                                                                                 | e-Appendix 4        |
| Reporting of conclusions should include |                                                                                                                           |                     |
| 32                                      | Consideration of alternative explanations for observed results                                                            | 6-9                 |
| 33                                      | Generalization of the conclusions (ie, appropriate for the data presented and within the domain of the literature review) | 9                   |
| 34                                      | Guidelines for future research                                                                                            | -                   |
| 35                                      | Disclosure of funding source                                                                                              | 1                   |

e-Appendix 2. Search Strategies for the different database ran on July 18, 2020.

e-Appendix 2A. Medline (OVID)

Ovid MEDLINE(R) and Epub Ahead of Print, In-Process & Other Non-Indexed Citations and Daily 1946 to July 18, 2020

1. exp coronaviridae infections/ or exp coronavirus infections/
  2. exp Coronavirus/
  3. 2019-nCoV.mp.
  4. SARS-CoV.mp. or exp SARS Virus/
  5. MERS-CoV.mp. or exp Middle East Respiratory Syndrome Coronavirus/
  6. severe acute respiratory syndrome.mp. or exp Severe Acute Respiratory Syndrome/
  7. 1 or 2 or 3 or 4 or 5 or 6
  8. (critical\* adj4 care).mp. [mp=title, abstract, original title, name of substance word, subject heading word, floating sub-heading word, keyword heading word, organism supplementary concept word, protocol supplementary concept word, rare disease supplementary concept word, unique identifier, synonyms]
  9. intensive care.mp. or exp Critical Care/
  10. (critical\* adj4 ill).mp. [mp=title, abstract, original title, name of substance word, subject heading word, floating sub-heading word, keyword heading word, organism supplementary concept word, protocol supplementary concept word, rare disease supplementary concept word, unique identifier, synonyms]
  11. (critical\* adj4 condition).mp. [mp=title, abstract, original title, name of substance word, subject heading word, floating sub-heading word, keyword heading word, organism supplementary concept word, protocol supplementary concept word, rare disease supplementary concept word, unique identifier, synonyms]
  12. (severe\* adj4 ill).mp. [mp=title, abstract, original title, name of substance word, subject heading word, floating sub-heading word, keyword heading word, organism supplementary concept word, protocol supplementary concept word, rare disease supplementary concept word, unique identifier, synonyms]
  13. (terminal\* adj4 ill).mp. [mp=title, abstract, original title, name of substance word, subject heading word, floating sub-heading word, keyword heading word, organism supplementary concept word, protocol supplementary concept word, rare disease supplementary concept word, unique identifier, synonyms]
  14. (terminal\* adj4 condition).mp. [mp=title, abstract, original title, name of substance word, subject heading word, floating sub-heading word, keyword heading word, organism supplementary concept word, protocol supplementary concept word, rare disease supplementary concept word, unique identifier, synonyms]
  15. 8 or 9 or 10 or 11 or 12 or 13 or 14
- 7 AND 15

## e-Appendix 2B. Embase (OVID)

Ovid Embase and Epub Ahead of Print, In-Process & Other Non-Indexed Citations and Daily 1946 to July 18, 2020

1. exp coronaviridae infections/ or exp coronavirus infections/
2. exp Coronavirus/
3. 2019-nCoV.mp.
4. SARS-CoV.mp. or exp SARS Virus/
5. MERS-CoV.mp. or exp Middle East Respiratory Syndrome Coronavirus/
6. severe acute respiratory syndrome.mp. or exp Severe Acute Respiratory Syndrome/
7. 1 or 2 or 3 or 4 or 5 or 6
8. (critical\* adj4 care).mp. [mp=title, abstract, original title, name of substance word, subject heading word, floating sub-heading word, keyword heading word, organism supplementary concept word, protocol supplementary concept word, rare disease supplementary concept word, unique identifier, synonyms]
9. intensive care.mp. or exp Critical Care/
10. (critical\* adj4 ill).mp. [mp=title, abstract, original title, name of substance word, subject heading word, floating sub-heading word, keyword heading word, organism supplementary concept word, protocol supplementary concept word, rare disease supplementary concept word, unique identifier, synonyms]
11. (critical\* adj4 condition).mp. [mp=title, abstract, original title, name of substance word, subject heading word, floating sub-heading word, keyword heading word, organism supplementary concept word, protocol supplementary concept word, rare disease supplementary concept word, unique identifier, synonyms]
12. (severe\* adj4 ill).mp. [mp=title, abstract, original title, name of substance word, subject heading word, floating sub-heading word, keyword heading word, organism supplementary concept word, protocol supplementary concept word, rare disease supplementary concept word, unique identifier, synonyms]
13. (terminal\* adj4 ill).mp. [mp=title, abstract, original title, name of substance word, subject heading word, floating sub-heading word, keyword heading word, organism supplementary concept word, protocol supplementary concept word, rare disease supplementary concept word, unique identifier, synonyms]
14. (terminal\* adj4 condition).mp. [mp=title, abstract, original title, name of substance word, subject heading word, floating sub-heading word, keyword heading word, organism supplementary concept word, protocol supplementary concept word, rare disease supplementary concept word, unique identifier, synonyms]
15. 8 or 9 or 10 or 11 or 12 or 13 or 14  
7 AND 15

## e-Appendix 2.C Cochrane Library

- #1 MeSH descriptor: [covid-19]
- #2 MeSH descriptor: [coronavirus]
- #3 MeSH descriptor: [SARS-CoV-2]
- #4 MeSH descriptor: [Intensive care] explode all trees
- #5 MeSH descriptor: [Critical care] explode all trees
- #6 MeSH descriptor: [Critically ill] explode all trees
- #7 #1 OR #2 OR #3
- #8 #4 OR #5 OR #6
- #9 #7 AND #8 with Cochrane Library publication date in the last 9 months

e-Appendix 3. Duplicate patient data details

| Author          | Sample size | Quality score | Country                          | Location        | Start date | End date   | Study type                                   | Study site                                                                                                                                                                                                 |
|-----------------|-------------|---------------|----------------------------------|-----------------|------------|------------|----------------------------------------------|------------------------------------------------------------------------------------------------------------------------------------------------------------------------------------------------------------|
| Xu J et al      | 239         |               | China                            | Wuhan           | 12/01/2020 | 03/02/2020 | Retrospective (Multi-centre )                | Jin Yin-tan Hospital, Wuhan Union Hospital and Wuhan Third Hospital                                                                                                                                        |
| Zhou F et al*   | 50          | 9/9           | China                            | Wuhan           | 29/12/2019 | 31/01/2020 | Retrospective cohort (Multi-centre)          | Jin Yin-tan Hospital (Wuhan, China) and Wuhan Pulmonary Hospital                                                                                                                                           |
| Huang C et al*  | 13          | 5/9           | China                            | Wuhan           | 16/12/2019 | 02/01/2020 | Prospective cohort (Single centre)           | Jin Yin-tan Hospital (Wuhan, China)                                                                                                                                                                        |
| Yang X et al*   | 52          |               | China                            | Wuhan           | 24/12/2020 | 26/01/2020 | Retrospective observational (Single centre)  | Jin Yin-tan Hospital (Wuhan, China)                                                                                                                                                                        |
| Guan et al*     | 173         |               | China                            |                 | 11/12/2019 | 29/01/2020 | Centre not specified - ethics by Jin Yin-tan | Jin Yin-tan Hospital - and more                                                                                                                                                                            |
| Zhang G et al   | 55          | 4/6           | China                            | Wuhan           | 02/01/2020 | 10/02/2020 | Retrospective case series (Single centre)    | Zhongnan hospital in Wuhan                                                                                                                                                                                 |
| Cao et al*      | 18          | 3/6           | China                            | Wuhan           | 03/01/2020 | 01/02/2020 | Retrospective Case series (Single centre)    | Zhongnan hospital in Wuhan                                                                                                                                                                                 |
| Wang D et al*   | 36          |               | China                            | Wuhan           | 01/01/2020 | 28/01/2020 | Retrospective Case series (Single centre)    | Zhongnan hospital in Wuhan                                                                                                                                                                                 |
| Wang Y et al    | 344         | 5/6           | China                            | Wuhan           | 25/01/2020 | 25/02/2020 | Case series (Single-centre)                  | Tongji Hospital                                                                                                                                                                                            |
| Lu et al*       | 244         | 6/9           | China                            | Wuhan           | 25/01/2020 | 25/02/2020 | Retrospective cohort study (Single centre)   | Tongji Hospital (Wuhan, China)                                                                                                                                                                             |
| Wang F et al*   | 14          | 4/6           | China                            | Wuhan           | 29/01/2020 | 10/02/2020 | Retrospective case series (Single centre)    | Tongji Hospital (Wuhan, China)                                                                                                                                                                             |
| Yan et al*      | 193         | 5/9           | China                            | Wuhan           | 10/01/2020 | 24/02/2020 | Retrospective observational (Single centre)  | Tongji Hospital (Wuhan, China)                                                                                                                                                                             |
| Li Y et al*     | 54          | 6/9           | China                            | Wuhan           | 28/01/2020 | 11/02/2020 | Retrospective (Single centre)                | Tongji Hospital of Huazhong University of Science and Technology                                                                                                                                           |
| Feng Y et al*   | 124         |               | China                            | Wuhan, Shanghai | 01/01/2020 | 15/02/2020 | Retrospective (Multi-centre)                 | Tongji Hospital, Jin Yin-tan Hospital, Shanghai public health clinical centre                                                                                                                              |
| Qin et al*      | 286         |               | China                            | Wuhan           | 10/01/2020 | 12/02/2020 | Retrospective (Single centre)                | Tongji Hospital (Wuhan, China)                                                                                                                                                                             |
| Liu et al*      | 41          |               | China                            | Wuhan           | 01/02/2020 | 24/02/2020 | Retrospective observational (Single centre)  | Tongji Hospital                                                                                                                                                                                            |
| Zheng et al     | 34          | 4/6           | China                            | Huangzhou       | 22/01/2020 | 05/03/2020 | Retrospective case series                    | First Affiliated Hospital of Zhejiang University, Huangzhou                                                                                                                                                |
| Liu et al*      | 23          | 2/6           | China                            | Hangzhou        | 22/01/2020 | 20/03/2020 | Retrospective Case series                    | First Affiliated Hospital of Medical College of Zhejiang University                                                                                                                                        |
| Grasselli et al | 1715        |               | Italy                            | Milan           | 20/02/2020 | 22/04/2020 | Retrospective observational cohort           | ICU network in Lombardy                                                                                                                                                                                    |
| ICNARC et al    | 10624       |               | England, Wales, Northern Ireland | -               | 01/03/2020 | 30/07/2020 | National clinical audit                      | ICNARC (Intensive Care National Audit & Research Centre) database- all NHS adult, general intensive care, combined intensive care/high dependency units in England – 289 participating critical care units |
| Fraser et al*   | 10          |               | England                          | London          | -          | -          |                                              | Level 3 academic ICU at London Health Sciences Centre - Victoria Campus                                                                                                                                    |



|                   |      |   |                |            |            |            |                                  |                                                                                                                     |
|-------------------|------|---|----------------|------------|------------|------------|----------------------------------|---------------------------------------------------------------------------------------------------------------------|
| Wendel et al*     | 639  | - | Multi-national | Europe     | 13/03/2020 | 22/04/2020 | Prospective observational cohort | RISC-19-ICU registry - 54 collaborating centres in 10 countries (NOTE: overlaps NHS and ICU network in Lombardy)    |
| Dochery et al*    | 3001 |   | United Kingdom |            | 06/02/2020 | 19/04/2020 | Prospective observational cohort | ISARIC (International Severe Acute Respiratory and emerging Infections Consortium) WHO - 208 participating hospital |
| Helms et al       | 150  |   | France         |            | 03/03/2020 | 31/03/2020 | Prospective cohort               | University Hospital of Strasbourg                                                                                   |
| Marullo et al*    | 17   |   | France         | Strasbourg | 03/03/2020 | 01/04/2020 |                                  | University Hospital of Strasbourg                                                                                   |
| Cummings et al    | 257  |   | United States  | New York   | 02/03/2020 | 01/04/2020 | Prospective cohort               | New York Presbyterian / Columbia University Irving Medical Center                                                   |
| Argenziano et al* | 236  |   | United States  | New York   | 01/03/2020 | 05/04/2020 | Retrospective study              | New York-Presbyterian / Columbia University Irving Medical Center                                                   |



## e-Appendix 4. Study characteristics

### e-Appendix 4A. Risk of bias quality assessment details

| No | First author       | Study Design               | Quality tool <sup>1</sup>     | Quality Assessment     | Quality Score | Quality Type |
|----|--------------------|----------------------------|-------------------------------|------------------------|---------------|--------------|
| 1  | Almazeedi et al    | Retrospective cohort       | NOS                           | S(4), C(2), O(2)       | 8/9           | Good         |
| 2  | Almit et al        | Retrospective chart review | NOS                           | S (4), C(2), O(3)      | 9/9           | Good         |
|    | Arentz et al       | Case series                | Case series tool <sup>2</sup> | S(1), A(2), c(0), R(1) | 4/6           | Fair         |
| 3  | Auld et al         | Retrospective cohort       | NOS                           | S(4), C(0), O(2)       | 6/9           | Poor         |
| 4  | Barrasa et al      | Prospective cohort         | NOS                           | S(3), C(0), O(2)       | 5/9           | Poor         |
| 5  | Bhatla et al       | Prospective cohort         | NOS                           | S(4), C(2), O(2)       | 8/9           | Good         |
| 6  | Bhatraju et al     | Case series                | Case series tool <sup>2</sup> | S(1), A(2), c(0), R(1) | 4/6           | Fair         |
| 7  | Borobia et al      | Retrospective cohort       | NOS                           | S(4), C(2), O(3)       | 9/9           | Good         |
| 8  | Cardoso et al      | Case series                | Case series tool <sup>2</sup> | S(1), A(0), c(0), R(1) | 2/6           | Poor         |
| 9  | Chen et al         | Retrospective case control | NOS                           | S(2), C(1), O(1)       | 4/9           | Poor         |
|    | Cui et al          | Case series                | Case series tool <sup>2</sup> | S(1), A(2), c(0), R(0) | 3/6           | Poor         |
| 10 | Cummings et al     | Prospective cohort         | NOS                           | S(4), C(1), O(2)       | 7/9           | Good         |
| 11 | Ferguson et al     | Chart review               | NOS                           | S(4), C(0), O(2)       | 6/9           | Poor         |
| 12 | Grasselli et al    | Retrospective cohort       | NOS                           | S (4), C(0), O(2)      | 6/9           | Poor         |
| 13 | Halasz et al       | Case series                | Case series tool <sup>2</sup> | S(1), A(1), c(1), R(1) | 4/6           | Fair         |
| 14 | Halvatsiotis et al | Case series                | Case series tool <sup>2</sup> | S(1), A(2), c(0), R(1) | 4/6           | Fair         |
| 15 | Helms et al        | Prospective cohort         | NOS                           | S (4), C(2), O (2)     | 8/9           | Good         |
| 16 | Hur et al          | Retrospective case control | NOS                           | S(4), C(1), O(2)       | 7/9           | Good         |
| 17 | ICNARC et al       | National clinical audit    | -                             | -                      | -             | -            |
| 18 | Khamis et al       | Case series                | Case series tool <sup>2</sup> | S(1), A(1), c(0), R(0) | 2/6           | Poor         |
| 19 | Klok et al         | Case series                | Case series tool <sup>2</sup> | S(1), A(2), c(0), R(0) | 3/6           | Poor         |
| 20 | Li J et al         | Retrospective case control | NOS                           | S(4), C(0), O(2)       | 6/9           | Poor         |
| 21 | Ling et al         | Retrospective cohort       | NOS                           | S(3), C(0), O(1)       | 4/9           | Poor         |
| 22 | Llitjos et al      | Retrospective case control | NOS                           | S(3), C(0), O(1)       | 4/9           | Poor         |
| 23 | Longchamp et al    | Case series                | Case series tool <sup>2</sup> | S(1), A(1), c(0), R(0) | 2/6           | Poor         |
| 24 | Maatman et al      | Retrospective cohort       | NOS                           | S(3), C(0), O(3)       | 6/9           | Poor         |
| 25 | Mitra et al        | Case series                | Case series tool <sup>2</sup> | S(1), A(2), c(0), R(1) | 4/6           | Fair         |
| 26 | Myers et al        | Retrospective cohort       | NOS                           | S(4), C(1), O(1)       | 6/9           | Poor         |
|    | Pavoni et al       | Case series                | Case series tool <sup>2</sup> | S(1), A(2), c(0), R(1) | 4/6           | Fair         |
| 27 | Pedersen et al     | Case series                | Case series tool <sup>2</sup> | S(1), A(1), c(1), R(0) | 3/6           | Poor         |
| 28 | Richardson et al   | Case series                | Case series tool <sup>2</sup> | S(1), A(2), c(0), R(1) | 4/6           | Fair         |
| 29 | Rodriguez et al    | Prospective cohort         | NOS                           | S(4), C(0), O(2)       | 6/9           | Poor         |
| 30 | Simonnet et al     | Retrospective cohort       | NOS                           | S(4), C(2), O(2)       | 8/9           | Good         |
| 31 | Thomas et al       | Case series                | Case series tool <sup>2</sup> | S(0), A(1), c(0), R(0) | 1/6           | Poor         |
| 32 | Wang Y et al       | Case series                | Case series tool <sup>2</sup> | S(1), A(2), c(1), R(1) | 5/6           | Good         |
| 33 | Wei et al          | Retrospective case control | NOS                           | S(3), C(1), O(2)       | 6/9           | Poor         |
|    | Wu et al           | Retrospective case control | NOS                           | S(4), C(1), O(2)       | 7/9           | Good         |
| 34 | Xu B et al         | Retrospective case control | NOS                           | S(4), C(1), O(2)       | 7/9           | Good         |

|    |               |                             |                                   |                        |      |      |
|----|---------------|-----------------------------|-----------------------------------|------------------------|------|------|
|    | Xu J et al    | Retrospective cohort        | NOS                               | S(4), C(1), O(2)       | 7/9  | Good |
| 35 | Yang L et al  | Retrospective case control  | NOS                               | S(4), C(1), O(2)       | 7/9  | Good |
| 36 | Yu et al      | Prospective cross-sectional | Cross sectional tool <sup>3</sup> | S(4), C(0), O(2)       | 6/10 | Poor |
| 37 | Zhang G et al | Case series                 | Case series tool <sup>2</sup>     | S(1), A(2), c(0), R(1) | 4/6  | Fair |
| 38 | Zhang J et al | Case series                 | Case series tool <sup>2</sup>     | S(1), A(0), c(0), R(0) | 1/6  | Poor |
| 39 | Zheng et al   | Case series                 | Case series tool <sup>2</sup>     | S(1), A(2), c(0), R(1) | 4/6  | Fair |
| 41 | Zhou Y et al  | Retrospective case control  | NOS                               | S(3), C(0), O(2)       | 5/9  | Poor |

S – Selection, C – Comparability, O – Outcome, A – Ascertainment, c – Causality, R – Reporting, <sup>1</sup>NOS Newcastle Ottawa Scale described by Wells et al, <sup>2</sup>NOS quality scale adapted for case series as described by Murad et al, <sup>3</sup>NOS quality scale adapted for cross-sectional studies as described by Modesti et al

#### e-Appendix 4B. Details of single / multi-centre studies

| First author       | Country       | State                                    | Multi/Single Center | Single Center Detail                                                 |
|--------------------|---------------|------------------------------------------|---------------------|----------------------------------------------------------------------|
| Almazeedi et al    | Kuwait        | Kuwait                                   | Single              | Jabet Al Ahmad Al-Sabah hospital                                     |
| Amit et al         | Israel        | Israel                                   | Multi <sup>1</sup>  | -                                                                    |
| Arentz et al       | United States | Washington                               | Single              | Evergreen Hospital                                                   |
| Auld et al         | United States | Georgia                                  | Multi <sup>2</sup>  | -                                                                    |
| Barrasa et al      | Spain         | Vitoria                                  | Single              | University Hospital Araba                                            |
| Bhatla et al       | United States | Pennsylvania                             | Single              | Hospital of University of Pennsylvania                               |
| Bhatraju et al     | United States | Seattle                                  | Multi <sup>3</sup>  | -                                                                    |
| Borobia et al      | Spain         | Madrid                                   | Single              | La Paz University Hospital                                           |
| Cardoso et al      | Portugal      | Lisbon                                   | Single              | Curry Cabral Hospital                                                |
| Chen et al         | China         | Hebei                                    | Multi               | -                                                                    |
| Cui et al          | China         | Wuhan                                    | Single              | Tongi Medical College, Huazhong University of Science and Technology |
| Cummings et al     | United States | New York                                 | Multi <sup>4</sup>  | -                                                                    |
| Ferguson et al     | United States | California                               | Multi <sup>5</sup>  | -                                                                    |
| Grasselli et al    | Italy         | Milan                                    | Multi <sup>6</sup>  | -                                                                    |
| Halasz et al       | Italy         | Piacenza                                 | Single              | Guglielmo da Saliceto Hospital                                       |
| Halvatsiotis et al | Greece        | Attica, Macedonia, Peloponnese, Thessaly | Multi <sup>7</sup>  | -                                                                    |
| Helms et al        | France        | Strasbourg                               | Multi <sup>8</sup>  | -                                                                    |
| Hur et al          | United States | Chicago                                  | Multi <sup>9</sup>  | -                                                                    |
| ICNARC et al       | England       | -                                        | Multi <sup>10</sup> | -                                                                    |
| Khamis et al       | Oman          | Muscat                                   | Multi <sup>11</sup> | -                                                                    |
| Klok et al         | Netherlands   | Leiden                                   | Multi <sup>12</sup> | -                                                                    |
| Li J et al         | China         | Wuhan                                    | Single              | Wuhan Fourth Hospital                                                |
| Ling et al         | China         | Hong Kong                                | Multi <sup>13</sup> | -                                                                    |
| Llitjos et al      | France        | -                                        | Multi <sup>14</sup> | -                                                                    |
| Longchamp et al    | Switzerland   | Sion                                     | Single              | Sion (Switzerland) Hospital                                          |
| Maatman et al      | United States | Indiana                                  | Multi <sup>15</sup> | -                                                                    |
| Mitra et al        | Canada        | British Columbia                         | Multi <sup>16</sup> | -                                                                    |
| Myers et al        | United States | California                               | Single              | Katser Permanente Northern California                                |
| Pavoni et al       | Italy         | Tuscany                                  | Single              | Santa Maria Annunziata Hospital                                      |
| Pedersen et al     | Denmark       | Roskilde                                 | Single              | Zealand University Hospital                                          |

Online supplements are not copyedited prior to posting and the author(s) take full responsibility for the accuracy of all data.

|                  |                |                        |                     |                                                                       |
|------------------|----------------|------------------------|---------------------|-----------------------------------------------------------------------|
| Richardson et al | United States  | New York               | Multi <sup>17</sup> | -                                                                     |
| Rodriguez et al  | Spain          | Tarragona              | Single              | Hospital Universitari de Tarragona Joan                               |
| Simonnet et al   | France         | Lille                  | Single              | Roger Salengro Hopsital                                               |
| Thomas et al     | United Kingdom | Cambridge              | Single              | Addenbrooke's Hospital                                                |
| Wang Y et al     | China          | Wuhan                  | Single              | Tongji hospital                                                       |
| Wei et al        | China          | Hubei province         | Single              | Suizhou Zengdu Hospital                                               |
| Wu et al         | China          | Jiangsu province &Anhu | Multi <sup>18</sup> | -                                                                     |
| Xu B et al       | China          | Wuhan                  | Single              | Hubei Provincial Hospital of traditional Chinese and Western medicine |
| Xu J et al       | China          | Wuhan                  | Multi <sup>19</sup> | -                                                                     |
| Yang L et al     | China          | Hubei province         | Single              | Yichang Central People's Hospital                                     |
| Yu et al         | China          | Wuhan                  | Multi <sup>20</sup> | -                                                                     |
| Zhang G et al    | China          | Wuhan                  | Single              | Zhongnan Hospital of Wuhan University                                 |
| Zhang J et al    | China          | Wuhan                  | Single              | Liyuan Hospital                                                       |
| Zheng et al      | China          | Huangzhou              | Single              | First Affiliated Hospital, Zhejiang University                        |
| Zhou Y et al     | China          | Jiangsu province       | Single              | The First Affiliated Hospital of Nanjing Medical University           |

<sup>1</sup> Israel COVID-19 ICU registry among 13 participating hospitals, <sup>2</sup> Three Emory Healthcare acute-care hospitals in Atlanta, <sup>3</sup> Nine hospital ICUs in Seattle: three University of Washington (UW) Medicine Hospitals (Harborview Medical Center, UW Medical Center–Montlake, and Northwest campuses), the Virginia Mason Medical Center, and the Swedish Hospitals (First Hill and Cherry Hill). This group represents six of the eight adult acute care hospitals in the city of Seattle; hospitals connected to these systems in suburbs outside Seattle (UW– Valley Medical Center, Swedish–Issaquah, and Swedish–Edmonds) were also included in the group of nine,, <sup>4</sup> Two New York Presbyterian hospitals affiliated with Columbia University Irving Medical Center in northern Manhattan, <sup>5</sup> Stanford University Hospital, Stanford Health Care-Valley Care, <sup>6</sup> ICU network in Lombardy - Fondazione IRCCS, <sup>7</sup> University hospital "ATTIKON", "EVANGELISMOS" general hospital, "THRIASSION" General hospital, "AHEPA" University hospital, "G.PANPANIKLAOU" General Hospital, "AGIOS DIMITRIOS" General Hospital, Patras Univeristy hospital, "KOUTLIBANEIO" General hospital, <sup>8</sup> Two centers of a French tertiary hospital, <sup>9</sup> Ten NorthWestern Medicine (NW) hospitals - NM Central DuPage Hospital, NM Huntley Hospital, NM Delnor Hospital, NM McHenry Hospital, NM Woodstock Hospital, NM Valley West Hospital, NM Kishwaukee Hospital, NM Lake Forest Hospital, Northwestern Memorial Hospital, Marianjoy Rehabilitation Hospital, <sup>10</sup> NHS hospitals and some non-NHS hospitals, <sup>11</sup> The Royal Hospital, Al Nahdha Hospital, <sup>12</sup> Leiden University Medical Center, Erasmus University Medical Center, Amphia Hospital Breda, <sup>13</sup> Prince of Wales Hospital, Princess Margaret Hospital, Pamela Youde Nethersole Eastern Hospital, <sup>14</sup> Two French intensive care units, <sup>15</sup> Three Indianapolis area hospital, <sup>16</sup> Vancouver General hospital, Surrey Memorial Hospital, Llons Gate Hospital, St Pauls Hospital, Royal Columbian Hospital, Richmond Hospital, <sup>17</sup> Hospitals in Northwell Health, <sup>18</sup> First People's Hospital of Yancheng city, Second People's Hospital of Fuyang City, Second People's hospital of Yancheng City, Fifth People's Hospital of Wuxi, <sup>19</sup> Wuhan Union, Jinyintan Hospital and Wuhan Third Hospital, <sup>20</sup> 16 centres – unknown

e-Appendix 5. Demographics and co-morbidities of ICU patients with COVID-19

| First author                            | N     | Demographics |               |                |                  | Comorbidities |          |                      |          |            |          |          |          |                     |          |                  |  |
|-----------------------------------------|-------|--------------|---------------|----------------|------------------|---------------|----------|----------------------|----------|------------|----------|----------|----------|---------------------|----------|------------------|--|
|                                         |       | Male         | Age           | Current smoker | BMI              | HTN           | DM       | CVD                  | CKD      | Malignancy | COPD     | CLD      | Asthma   | Immuno-suppressed   | OSA      | Organ transplant |  |
| Almazeedi et al (2020) <sup>63</sup>    | 42    | 32 (76%)     | 54.8(11)      | 5 (12%)        | 29.0 (5.1)       | 17 (41%)      | 18 (43%) | 9 (21%)              | 3 (7%)   | 1 (2%)     | 2 (5%)   | -        | 6 (14%)  | 0 (0%)              | -        | -                |  |
| Amit et al (2020) <sup>64</sup>         | 156   | 108 (69%)    | 72 (60-82)    | 2 (1%)         | -                | 85 (55%)      | 62 (40%) | 64 (41%)             | 24 (15%) | 8 (5%)     | 13 (8%)  | 2 (1%)   | -        | 6 (4%)              | -        | -                |  |
| Arentz et al (2020) <sup>52</sup>       | 21    | -            | -             | -              | -                | -             | 7 (33%)  | 9 (43%)              | 12 (57%) | -          | 7 (33%)  | 1 (5%)   | 2 (9%)   | 3 (14%)             | 6 (29%)  | 2 (10%)          |  |
| Auld et al (2020) <sup>53</sup>         | 217   | 119 (54%)    | 64 (54-73)    | -              | 30 (26-35)       | 134 (62%)     | 99 (46%) | 72 (33%)             | 58 (27%) | -          | 21 (10%) | -        | 19 (9%)  | -                   | -        | -                |  |
| Barrasa et al (2020) <sup>20</sup>      | 48    | 27 (56%)     | 67 (53-74)    | 9 (19%)        | -                | 21 (44%)      | 9 (19%)  | 5 (10%)              | -        | -          | -        | -        | -        | 3 (6%)              | -        | -                |  |
| Bhatla et al (2020) <sup>54</sup>       | 79    | 40 (51%)     | 63 (16)       | 4 (7%)         | 33 (12)          | 68 (78%)      | 35 (44%) | 43 (54%)             | 16 (20%) | -          | 14 (18%) | 14 (18%) | -        | -                   | 23 (29%) | -                |  |
| Bhatraju et al (2020) <sup>55</sup>     | 24    | 15 (63%)     | 64 (23-97)    | 5 (22%)        | 33.2 (7.2)       | -             | 14 (58%) | 2 (8%) <sup>16</sup> | 5 (21%)  | 0 (0%)     | 1 (4%)   | -        | 3 (14%)  | -                   | 5 (21%)  | -                |  |
| Borobia et al (2020) <sup>21</sup>      | 75    | 57 (76%)     | 64 (54-71)    | 10 (13%)       | -                | 39 (52%)      | 21 (28%) | -                    | 5 (7%)   | 12 (15%)   | 13 (17%) | 3 (4%)   | 4 (5%)   | 1 (1%)              | -        | -                |  |
| Cardoso et al (2020) <sup>22</sup>      | 20    | 18 (90%)     | 67 (52-74)    | -              | 29 (26-32)       | -             | -        | -                    | -        | -          | -        | -        | -        | -                   | -        | -                |  |
| Chen et al (2020) <sup>37</sup>         | 51    | 27 (53%)     | 58.9 (13.7)   | 4 (8%)         | -                | 21 (41%)      | 11 (22%) | 17 (33%)             | 2 (4%)   | 1 (2%)     | -        | 3 (6%)   | -        | -                   | -        | -                |  |
| Cui et al (2020) <sup>38</sup>          | 81    | 37 (46%)     | 59.9 (14.1)   | 35 (43%)       | -                | 20 (25%)      | 8 (10%)  | 10 (12%)             | -        | -          | -        | -        | -        | -                   | -        | -                |  |
| Cummings et al (2020) <sup>56</sup>     | 257   | 171 (67%)    | 62 (51-72)    | 33 (13%)       | 30.8 (7.7)       | 162 (63%)     | 92 (36%) | 49 (19%)             | 37 (14%) | 18 (7%)    | 24 (9%)  | 5 (2%)   | 21 (8%)  | 8 (3%) <sup>9</sup> | -        | 10 (4%)          |  |
| Ferguson et al (2020) <sup>57</sup>     | 21    | -            | -             | -              | -                | -             | -        | -                    | -        | -          | -        | -        | -        | -                   | -        | -                |  |
| Grasselli et al (2020) <sup>23</sup>    | 1715  | -            | 65 (56-70)    | -              | -                | -             | -        | -                    | -        | -          | -        | -        | -        | -                   | -        | -                |  |
| Halasz et al (2020) <sup>24</sup>       | 242   | 194 (80%)    | 64 (56-71)    | -              | 27.7 (25.4-29.7) | 110 (46%)     | 37 (15%) | 35 (15%)             | -        | -          | 21 (9%)  | -        | -        | -                   | -        | -                |  |
| Halvatsiotis et al (2020) <sup>25</sup> | 90    | 72 (80%)     | 65.5 (56-73)  | 26 (29%)       | 28 (26.1-32.0)   | 45 (50%)      | 17 (19%) | 19 (21%)             | 4 (4%)   | 7 (8%)     | 8 (9%)   | 7 (6%)   | 3 (3%)   | -                   | -        | -                |  |
| Helms et al (2020) <sup>26</sup>        | 150   | 122 (81%)    | 63 (53-71)    | -              | -                | -             | 30 (20%) | 72 (48%)             | 6 (4%)   | 9 (6%)     | -        | 4 (3%)   | -        | -                   | -        | -                |  |
| Hur et al (2020) <sup>58</sup>          | 138   | 88 (64%)     | -             | -              | -                | 85 (62%)      | 56 (41%) | 40 (29%)             | 12 (9%)  | 20 (15%)   | -        | -        | -        | 15 (11%)            | 17 (12%) | 7(5%)            |  |
| ICNARC et al (2020) <sup>27</sup>       | 10624 | 7458 (70%)   | 60 (21-68)    | -              | -                | -             | -        | 68 (1%)              | 180 (2%) | -          | -        | -        | -        | 365 (4%)            | -        | -                |  |
| Khamis et al (2020) <sup>65</sup>       | 24    | 21 (88%)     | 50 (17)       | -              | -                | 7 (29%)       | 11 (46%) | -                    | 1 (4%)   | -          | -        | -        | -        | -                   | -        | -                |  |
| Klok et al (2020) <sup>28,29</sup>      | 184   | 139 (76%)    | -             | -              | -                | -             | -        | -                    | -        | -          | -        | -        | -        | -                   | -        | -                |  |
| Li J et al (2020) <sup>39</sup>         | 74    | 44 (60%)     | 65 (55-72)    | 10 (14%)       | -                | 35 (47%)      | 14 (19%) | 6 (8%)               | -        | 2 (3%)     | -        | 2 (3%)   | -        | -                   | -        | -                |  |
| Ling et al (2020) <sup>40</sup>         | 8     | 4 (50%)      | 64 (42-70)    | 1 (13%)        | -                | 3 (38%)       | 2 (25%)  | 0 (0%)               | 2 (25%)  | 0 (0%)     | 0 (0%)   | 0 (0%)   | 0 (0%)   | -                   | -        | -                |  |
| Llitjos et al (2020) <sup>30</sup>      | 26    | 20 (77%)     | 68(51.5-74.5) | 7 (27%)        | -                | 22 (85%)      | -        | -                    | -        | 0 (0%)     | -        | -        | -        | -                   | -        | -                |  |
| Longchamp et al (2020) <sup>31</sup>    | 25    | 16 (64%)     | 68 (49-82)    | 6 (24%)        | -                | 10 (40%)      | 1 (4%)   | 3 (12%)              | -        | 2 (8%)     | 2 (6%)   | -        | 1 (4%)   | -                   | 3 (12%)  | -                |  |
| Maatman et al (2020) <sup>59</sup>      | 109   | 62 (57%)     | 61 (18-95)    | 33 (30%)       | 34.8 (11.8)      | 74 (68%)      | 43 (39%) | 17 (15%)             | 16 (15%) | -          | 18 (16%) | -        | 16 (15%) | -                   | -        | -                |  |



|                                       |     |                    |              |                 |                  |                   |                  |                  |                 |                 |                 |                |               |                  |                |               |
|---------------------------------------|-----|--------------------|--------------|-----------------|------------------|-------------------|------------------|------------------|-----------------|-----------------|-----------------|----------------|---------------|------------------|----------------|---------------|
| Mitra et al (2020) <sup>60</sup>      | 117 | 78 (68%)           | 69 (60-75)   | 16 (14%)        | 38 (32-5)        | 54 (46%)          | 36 (31%)         | 20 (17%)         | 15 (13%)        | 7 (6%)          | 8 (7%)          | 2 (2%)         | 14 (12%)      | -                | -              | -             |
| Myers et al (2020) <sup>61</sup>      | 113 | 74 (66%)           | 63 (53-73)   | -               | -                | 58 (51%)          | 45 (40%)         | -                | 12 (11%)        | 6 (5%)          | -               | -              | -             | -                | -              | -             |
| Pavoni et al (2020) <sup>32</sup>     | 40  | 24 (60%)           | 61 (13)      | -               | 28.4 (4.7)       | 16 (40%)          | 16 (40%)         | 12 (30%)         | -               | -               | 4 (10%)         | -              | -             | -                | -              | -             |
| Pedersen et al (2020) <sup>33</sup>   | 16  | 12 (75%)           | 69.5 (56-84) | 7 (44%)         | 28.9 (8.5)       | 9 (56%)           | 2 (13%)          | 3 (19%)          | -               | 3 (19%)         | -               | -              | -             | -                | -              | -             |
| Richardson et al (2020) <sup>62</sup> | 373 | -                  | -            | -               | -                | -                 | -                | -                | -               | -               | -               | -              | -             | -                | -              | -             |
| Rodriguez et al (2020) <sup>34</sup>  | 43  | 27 (63%)           | 65 (52-72)   | -               | -                | 13 (30%)          | 8 (18%)          | 6 (14%)          | 2 (5%)          | -               | -               | -              | -             | -                | -              | -             |
| Simonnet et al (2020) <sup>35</sup>   | 124 | 90 (73%)           | 60 (51-70)   | -               | 29.6 (26.4-36.4) | 60 (49%)          | 28 (23%)         | -                | -               | -               | -               | -              | -             | -                | -              | -             |
| Thomas et al (2020) <sup>36</sup>     | 63  | 44 (69%)           | -            | -               | -                | -                 | -                | -                | -               | -               | -               | -              | -             | -                | -              | -             |
| Wang Y et al (2020) <sup>41</sup>     | 344 | 179 (52%)          | 64 (52-72)   | -               | -                | 141 (41%)         | 64 (19%)         | 40 (12%)         | -               | -               | 16 (5%)         | -              | -             | -                | -              | -             |
| Wei et al (2020) <sup>42</sup>        | 14  | 10 (71%)           | 65 (60-73)   | 4 (29%)         | 24.2 (22.5-25.5) | 8 (57%)           | 2 (14%)          | 5 (36%)          | -               | 1 (7%)          | 2 (14%)         | -              | -             | -                | -              | -             |
| Wu et al (2020) <sup>43</sup>         | 83  | 45 (54%)           | 63.0 (10.2)  | -               | -                | -                 | -                | -                | 2 (2%)          | -               | 1 (1%)          | 4 (5%)         | -             | -                | -              | 2 (2%)        |
| Xu B et al (2020) <sup>44</sup>       | 107 | 73 (68%)           | -            | -               | -                | 35 (33%)          | -                | -                | -               | -               | -               | -              | -             | -                | -              | -             |
| Xu J et al (2020) <sup>45</sup>       | 239 | 143 (60%)          | 62.5 (13.3)  | -               | -                | 105 (44%)         | 44 (18%)         | 48 (20%)         | -               | 13 (5%)         | -               | 20 (8%)        | -             | -                | -              | -             |
| Yang L et al (2020) <sup>46</sup>     | 29  | 16 (55%)           | 71 (13.4)    | 1 (3%)          | -                | 9 (31%)           | 4 (14%)          | -                | 2 (7%)          | 1 (3%)          | -               | 0 (0%)         | -             | -                | -              | -             |
| Yu et al (2020) <sup>47</sup>         | 226 | 139 (62%)          | 64 (57-70)   | -               | -                | 96 (43%)          | 47 (21%)         | 47 (21%)         | 8 (4%)          | 10 (4%)         | -               | 3 (1%)         | -             | -                | -              | -             |
| Zhang G et al (2020) <sup>48</sup>    | 55  | 35 (64%)           | 62 (52-74)   | -               | -                | 26 (47%)          | 7 (13%)          | 24 (44%)         | 5 (9%)          | 4 (7%)          | 4 (7%)          | 4 (7%)         | -             | 1 (2%)           | -              | -             |
| Zhang J et al (2020) <sup>49</sup>    | 19  | 11 (58%)           | 73 (38-91)   | -               | -                | 11 (58%)          | 4 (21%)          | 6 (32%)          | -               | -               | -               | -              | -             | -                | -              | -             |
| Zheng et al (2020) <sup>50</sup>      | 34  | 23 (67%)           | 66 (58-76)   | -               | -                | 22 (65%)          | 8 (24%)          | 4 (12%)          | 2 (6%)          | -               | 2 (6%)          | 4 (12%)        | -             | -                | -              | -             |
| Zhou Y et al (2020) <sup>51</sup>     | 21  | 13 (62%)           | 66.1 (13.9)  | -               | -                | 10 (48%)          | 5 (24%)          | 11 (52%)         | 0 (0%)          | -               | 2 (10%)         | -              | -             | 0 (0%)           | -              | -             |
| Crude prevalence/ sample size (%)     |     | 9927/14431 (68.8%) | -            | 218/132 (16.5%) | -                | 1631/3283 (49.7%) | 907/3345 (27.1%) | 766/13604 (5.6%) | 431/1278 (3.4%) | 125/1925 (6.5%) | 183/2053 (8.9%) | 78/1744 (4.5%) | 89/985 (9.0%) | 402/11437 (3.5%) | 54/287 (18.8%) | 21/499 (4.2%) |

Data are median (IQR) or mean (SD) or n (%). BMI – Body Mass Index, CAD – Coronary Artery Disease, CCF – Congestive Cardiac Failure, CKD - Chronic Kidney Disease - stage 3 or higher and/or end-stage renal disease, CLD – Chronic Liver Disease, COPD – Chronic Obstructive Pulmonary Disease, CVD – Cardiovascular Disease, DM – Diabetes Mellitus, HTN – Hypertension, ICNARC – Intensive Care National Audit & Research Centre, OSA – Obstructive Sleep Apnoea: as defined by the authors

e-Appendix 6. Initial presenting symptoms of ICU patients with COVID-19

| First author                            | N     | Symptoms  |           |           |           |          |          |          |             |          |             |          |          |            |            |                             |
|-----------------------------------------|-------|-----------|-----------|-----------|-----------|----------|----------|----------|-------------|----------|-------------|----------|----------|------------|------------|-----------------------------|
|                                         |       | Cough     | Dysnoea   | Fever     | Diarrhoea | Fatigue  | Sputum   | Myalgia  | Sore throat | Headache | Rhinorrhoea | N&V      | Anorexia | Hemoptysis | Chest pain | Symptoms onset to ICU, days |
| Almazeedi et al (2020) <sup>63</sup>    | 42    | 23 (55%)  | 12 (29%)  | -         | 1 (2%)    | 3 (7%)   | 6 (14%)  | 4 (10%)  | 4 (10%)     | 1 (2%)   | -           | 2 (5%)   | -        | 0 (0%)     | -          | -                           |
| Amit et al (2020) <sup>64</sup>         | 156   | -         | -         | -         | -         | -        | -        | -        | -           | -        | -           | -        | -        | -          | -          | -                           |
| Arentz et al (2020) <sup>52</sup>       | 21    | 11 (48%)  | 17 (76%)  | 11 (52%)  | -         | -        | -        | -        | -           | -        | -           | -        | -        | -          | -          | -                           |
| Auld et al (2020) <sup>53</sup>         | 217   | -         | -         | -         | -         | -        | -        | -        | -           | -        | -           | -        | -        | -          | -          | -                           |
| Barrasa et al (2020) <sup>20</sup>      | 48    | 35 (73%)  | 42 (88%)  | 48 (100%) | -         | -        | -        | 0 (0%)   | -           | -        | -           | -        | -        | -          | -          | 7 (5-12)                    |
| Bhatla et al (2020) <sup>54</sup>       | 79    | -         | -         | -         | -         | -        | -        | -        | -           | -        | -           | -        | -        | -          | -          | -                           |
| Bhatraju et al (2020) <sup>55</sup>     | 24    | 21 (88%)  | 21 (88%)  | 12 (50%)  | -         | -        | 10 (42%) | 2 (8%)   | 2 (8%)      | 2 (8%)   | 4 (17%)     | -        | -        | -          | -          | -                           |
| Borobia et al (2020) <sup>21</sup>      | 75    | -         | -         | -         | -         | -        | -        | -        | -           | -        | -           | -        | -        | -          | -          | -                           |
| Cardoso et al (2020) <sup>22</sup>      | 20    | -         | -         | -         | -         | -        | -        | -        | -           | -        | -           | -        | -        | -          | -          | -                           |
| Chen et al (2020) <sup>37</sup>         | 51    | 34 (67%)  | 18 (35%)  | 48 (94%)  | 6 (12%)   | 14 (28%) | 19 (38%) | 7 (14%)  | -           | 4 (8%)   | -           | -        | -        | -          | -          | 10.2 (4.7)                  |
| Cui et al (2020) <sup>38</sup>          | 81    | -         | -         | -         | -         | -        | -        | -        | -           | -        | -           | -        | -        | -          | -          | -                           |
| Cummings et al (2020) <sup>56</sup>     | 257   | 169 (66%) | 190 (74%) | 183 (71%) | 32 (12%)  | -        | -        | 67 (26%) | 15 (6%)     | 10 (4%)  | 19 (7%)     | -        | -        | -          | -          | -                           |
| Ferguson et al (2020) <sup>57</sup>     | 21    | 14 (67%)  | 12 (57%)  | 16 (76%)  | 6 (29%)   | 5 (24%)  | 3 (14%)  | 13 (62%) | 5 (24%)     | 5 (24%)  | 4 (19%)     | 2 (10%)  | -        | -          | 2 (10%)    | -                           |
| Grasselli et al (2020) <sup>23</sup>    | 1715  | -         | -         | -         | -         | -        | -        | -        | -           | -        | -           | -        | -        | -          | -          | 8 (4-11)                    |
| Halasz et al (2020) <sup>24</sup>       | 242   | -         | -         | -         | -         | -        | -        | -        | -           | -        | -           | -        | -        | -          | -          | -                           |
| Halvatsiotis et al (2020) <sup>25</sup> | 90    | -         | -         | -         | -         | -        | -        | -        | -           | -        | -           | -        | -        | -          | -          | -                           |
| Helms et al (2020) <sup>26</sup>        | 150   | -         | -         | -         | -         | -        | -        | -        | -           | -        | -           | -        | -        | -          | -          | -                           |
| Hur et al (2020) <sup>58</sup>          | 138   | 113 (82%) | 116 (84%) | 107 (78%) | 38 (28%)  | 69 (50%) | -        | -        | -           | -        | -           | 17 (12%) | -        | -          | -          | -                           |
| ICNARC et al (2020) <sup>27</sup>       | 10624 | -         | -         | -         | -         | -        | -        | -        | -           | -        | -           | -        | -        | -          | -          | -                           |
| Khamis et al (2020) <sup>65</sup>       | 24    | -         | 15 (63%)  | -         | -         | -        | -        | -        | -           | -        | -           | -        | -        | -          | -          | -                           |
| Klok et al (2020) <sup>28,29</sup>      | 184   | -         | -         | -         | -         | -        | -        | -        | -           | -        | -           | -        | -        | -          | -          | -                           |
| Li J et al (2020) <sup>39</sup>         | 74    | 34 (46%)  | 49 (66%)  | 67 (91%)  | 6 (8%)    | 49 (66%) | 13 (18%) | 23 (31%) | -           | -        | -           | -        | 41 (55%) | 6 (8%)     | -          | -                           |
| Ling et al (2020) <sup>40</sup>         | 8     | 6 (75%)   | 8 (100%)  | 8 (100%)  | 2 (25%)   | -        | 5 (63%)  | -        | -           | 0 (0%)   | 0 (0%)      | -        | -        | -          | -          | 10 (9-11)                   |
| Llitjos et al (2020) <sup>30</sup>      | 26    | -         | -         | -         | -         | -        | -        | -        | -           | -        | -           | -        | -        | -          | -          | 7 (3-2-8-7)                 |
| Longchamp et al (2020) <sup>31</sup>    | 25    | -         | -         | -         | -         | -        | -        | -        | -           | -        | -           | -        | -        | -          | -          | 10 (3)                      |
| Maatman et al (2020) <sup>59</sup>      | 109   | -         | -         | -         | -         | -        | -        | -        | -           | -        | -           | -        | -        | -          | -          | -                           |
| Mitra et al (2020) <sup>60</sup>        | 117   | -         | -         | -         | -         | -        | -        | -        | -           | -        | -           | -        | -        | -          | -          | 8 (4-5)                     |
| Myers et al (2020) <sup>61</sup>        | 113   | 40 (35%)  | 67 (59%)  | 39 (35%)  | -         | -        | -        | -        | -           | -        | -           | -        | -        | -          | -          | -                           |
| Pavoni et al (2020) <sup>32</sup>       | 40    | -         | -         | -         | -         | -        | -        | -        | -           | -        | -           | -        | -        | -          | -          | 11.6 (4)                    |
| Pedersen et al (2020) <sup>33</sup>     | 16    | -         | -         | -         | -         | -        | -        | -        | -           | -        | -           | -        | -        | -          | -          | -                           |
| Richardson et al (2020) <sup>62</sup>   | 373   | -         | -         | -         | -         | -        | -        | -        | -           | -        | -           | -        | -        | -          | -          | -                           |
| Rodriguez et al (2020) <sup>34</sup>    | 43    | -         | -         | -         | -         | -        | -        | -        | -           | -        | -           | -        | -        | -          | -          | -                           |
| Simonnet et al (2020) <sup>35</sup>     | 124   | -         | -         | -         | -         | -        | -        | -        | -           | -        | -           | -        | -        | -          | -          | -                           |

# CHEST™ Online Supplement

|                                    |     |                   |                  |                   |                  |                 |                 |                 |                |               |               |               |                 |              |               |   |
|------------------------------------|-----|-------------------|------------------|-------------------|------------------|-----------------|-----------------|-----------------|----------------|---------------|---------------|---------------|-----------------|--------------|---------------|---|
| Thomas et al (2020) <sup>36</sup>  | 63  | -                 | -                | -                 | -                | -               | -               | -               | -              | -             | -             | -             | -               | -            | -             | - |
| Wang Y et al (2020) <sup>41</sup>  | 344 | 233 (68%)         | 208 (61%)        | 301 (88%)         | 92 (27%)         | 167 (49%)       | 135 (39%)       | -               | -              | -             | -             | -             | 91 (27%)        | -            | -             | - |
| Wei et al (2020) <sup>42</sup>     | 14  | 14 (100%)         | 6 (43%)          | 8 (57%)           | 1 (7%)           | 8 (57%)         | 10 (71%)        | 2 (14%)         | 3 (21%)        | 2 (14%)       | -             | 3 (21%)       | -               | 1 (7%)       | -             | - |
| Wu et al (2020) <sup>43</sup>      | 83  | 83 (100%)         | 83 (100%)        | 83 (100%)         | 6 (7%)           | -               | -               | 43 (52%)        | 25 (30%)       | -             | 11 (13%)      | 3 (4%)        | -               | -            | 9 (11%)       | - |
| Xu B et al (2020) <sup>44</sup>    | 107 | 85 (79%)          | -                | 90 (84%)          | 27 (25%)         | -               | -               | 19 (18%)        | 4 (4%)         | 6 (6%)        | -             | 13 (12%)      | -               | -            | 8 (8%)        | - |
| Xu J et al (2020) <sup>45</sup>    | 239 | -                 | -                | -                 | -                | -               | -               | -               | -              | -             | -             | -             | -               | -            | -             | - |
| Yang L et al (2020) <sup>46</sup>  | 29  | 16 (55%)          | 22 (76%)         | -                 | 3 (10%)          | -               | -               | 5 (17%)         | 1 (3%)         | 2 (7%)        | -             | 2 (7%)        | -               | -            | -             | - |
| Yu et al (2020) <sup>47</sup>      | 226 | -                 | -                | -                 | -                | -               | -               | -               | -              | -             | -             | -             | -               | -            | -             | - |
| Zhang G et al (2020) <sup>48</sup> | 55  | 36 (66%)          | 35 (63%)         | -                 | 9 (16%)          | 42 (76%)        | -               | -               | 8 (15%)        | 4 (7%)        | -             | -             | 34 (62%)        | -            | -             | - |
| Zhang J et al (2020) <sup>49</sup> | 19  | 8 (42%)           | 2 (11%)          | 13 (69%)          | -                | -               | -               | -               | -              | -             | -             | -             | -               | -            | -             | 6 |
| Zheng et al (2020) <sup>50</sup>   | 34  | 7 (21%)           | -                | 20 (59%)          | 2 (6%)           | 2 (6%)          | 10 (29%)        | 5 (15%)         | -              | 2 (6%)        | -             | -             | -               | -            | -             | - |
| Zhou Y et al (2020) <sup>51</sup>  | 21  | 19 (91%)          | 12 (57%)         | 17 (81%)          | 5 (24%)          | 5 (24%)         | 10 (47%)        | 2 (10%)         | 4 (19%)        | 0 (0%)        | -             | 0 (0%)        | -               | 1 (5%)       | -             | - |
| Crude prevalence/ sample size (%)  |     | 1001/1503 (66.6%) | 935/1386 (67.5%) | 1071/1377 (77.8%) | 236/1278 (18.5%) | 364/794 (45.8%) | 221/633 (34.9%) | 192/781 (24.6%) | 71/701 (10.1%) | 38/663 (5.7%) | 38/393 (9.7%) | 42/455 (9.2%) | 166/473 (35.1%) | 8/151 (5.3%) | 19/211 (9.0%) | - |

Data are n (%), ICNARC – Intensive Care National Audit & Research Centre, N&V – nausea and vomiting, Note: Only studies that reported signs and symptom on initial hospital presentation

e-Appendix 7. Initial laboratory and radiological findings of ICU patients with COVID-19

| First author                            | N     | Laboratory                       |                        |                |                  |                       |                  | Pulmonary radiology               |                          |
|-----------------------------------------|-------|----------------------------------|------------------------|----------------|------------------|-----------------------|------------------|-----------------------------------|--------------------------|
|                                         |       | Lymphocyte (x10 <sup>9</sup> /L) | D-Dimer                | CRP (mg/L)     | Lactate (mmol/L) | Procalcitonin (ng/mL) | Ferritin (µg/mL) | CXR - Bilateral chest infiltrates | CT--Ground glass opacity |
| Almazeedi et al (2020) <sup>63</sup>    | 42    | -                                | 1357 (1392) mg/mL      | 121 (120)      | -                | 0.79 (1.9)            | -                | 22 (52%)                          | 7 (17%)                  |
| Amit et al (2020) <sup>64</sup>         | 156   | -                                | -                      | -              | -                | -                     | -                | -                                 | -                        |
| Arentz et al (2020) <sup>52</sup>       | 21    | 0.889 (0.2-2.39)                 | -                      | -              | 1.8 (0.8-4.9)    | 1.8 (0.12-9.56)       | -                | 6 (29%)                           | 10 (48%)                 |
| Auld et al (2020) <sup>53</sup>         | 217   | -                                | 1731 (934-6948) ng/mL  | 190 (126-262)  | -                | -                     | -                | -                                 | -                        |
| Barrasa et al (2020) <sup>20</sup>      | 48    | -                                | -                      | -              | -                | -                     | -                | -                                 | -                        |
| Bhatla et al (2020) <sup>54</sup>       | 79    | -                                | 7.2 (21.1) ng/mL       | 112.3 (52.1)   | -                | 2.8 (10.8)            | -                | -                                 | -                        |
| Bhatraju et al (2020) <sup>55</sup>     | 24    | 0.72 (0.52-1.375)                | -                      | -              | -                | -                     | -                | 23 (4%)                           | -                        |
| Borobia et al (2020) <sup>21</sup>      | 75    | -                                | -                      | -              | -                | -                     | -                | -                                 | -                        |
| Cardoso et al (2020) <sup>22</sup>      | 20    | -                                | -                      | -              | 1.1 (0.8-1.2)    | -                     | -                | -                                 | -                        |
| Chen et al (2020) <sup>37</sup>         | 51    | -                                | -                      | -              | -                | -                     | -                | -                                 | -                        |
| Cui et al (2020) <sup>38</sup>          | 81    | -                                | -                      | -              | -                | -                     | -                | -                                 | -                        |
| Cummings et al (2020) <sup>56</sup>     | 257   | -                                | -                      | -              | -                | -                     | -                | -                                 | -                        |
| Ferguson et al (2020) <sup>57</sup>     | 21    | 0.89 (0.52-1.09)                 | -                      | -              | -                | -                     | 1422 (817-1944)  | 19 (91%)                          | -                        |
| Grasselli et al (2020) <sup>23</sup>    | 1715  | -                                | -                      | -              | -                | -                     | -                | -                                 | -                        |
| Halasz et al (2020) <sup>24</sup>       | 242   | -                                | -                      | -              | -                | -                     | -                | -                                 | -                        |
| Halvatsiotis et al (2020) <sup>25</sup> | 90    | -                                | -                      | -              | -                | -                     | -                | -                                 | -                        |
| Helms et al (2020) <sup>26</sup>        | 150   | -                                | 2.27 (1.16-20) mg/L    | -              | -                | -                     | -                | -                                 | -                        |
| Hur et al (2020) <sup>58</sup>          | 138   | -                                | -                      | -              | -                | -                     | -                | -                                 | -                        |
| ICNARC et al (2020) <sup>27</sup>       | 10624 | -                                | -                      | -              | -                | -                     | -                | -                                 | -                        |
| Khamis et al (2020) <sup>65</sup>       | 24    | -                                | -                      | -              | -                | -                     | -                | 12 (50%)                          | -                        |
| Klok et al (2020) <sup>28,29</sup>      | 184   | -                                | -                      | -              | -                | -                     | -                | -                                 | -                        |
| Li J et al (2020) <sup>39</sup>         | 74    | -                                | -                      | -              | -                | -                     | -                | -                                 | 74 (100%)                |
| Ling et al (2020) <sup>40</sup>         | 8     | 0.6 (0.5-0.85)                   | -                      | 194 (72.9-284) | -                | -                     | -                | 8 (100%)                          | -                        |
| Llitjos et al (2020) <sup>30</sup>      | 26    | -                                | 1750 (1130-2850) ng/mL | 187 (147-279)  | -                | -                     | -                | -                                 | -                        |
| Longchamp et al (2020) <sup>31</sup>    | 25    | -                                | -                      | -              | -                | -                     | -                | -                                 | -                        |
| Maatman et al (2020) <sup>59</sup>      | 109   | -                                | -                      | -              | -                | -                     | -                | -                                 | -                        |
| Mitra et al (2020) <sup>60</sup>        | 117   | 0.8 (0.5-1)                      | -                      | -              | 1.5 (1.1-1.9)    | -                     | -                | -                                 | -                        |
| Myers et al (2020) <sup>61</sup>        | 113   | 0.9 (0.7-1.2)                    | -                      | -              | 1.4 (1.0-1.8)    | -                     | -                | 96 (85%)                          | -                        |
| Pavoni et al (2020) <sup>32</sup>       | 40    | -                                | -                      | -              | -                | -                     | -                | 40                                | -                        |
| Pedersen et al (2020) <sup>33</sup>     | 16    | -                                | 13.4 (8.2) mg/L        | 343 (110)      | 1.3 (0.8)        | -                     | 2744 (2211)      | -                                 | -                        |
| Richardson et al (2020) <sup>62</sup>   | 373   | -                                | -                      | -              | -                | -                     | -                | -                                 | -                        |
| Rodriguez et al (2020) <sup>34</sup>    | 43    | -                                | -                      | -              | -                | -                     | -                | -                                 | -                        |
| Simonnet et al (2020) <sup>35</sup>     | 124   | -                                | -                      | -              | -                | -                     | -                | -                                 | -                        |
| Thomas et al (2020) <sup>36</sup>       | 63    | -                                | -                      | -              | -                | -                     | -                | -                                 | -                        |
| Wang Y et al (2020) <sup>41</sup>       | 344   | 0.9 (0.6-1.2)                    | 1.3 (0.5-5.0) µg/mL    | 55 (14-106)    | -                | 0.9 (0.4-2.3)         | -                | 110 (32%)                         | 164 (48%)                |
| Wei et al (2020) <sup>42</sup>          | 14    | 0.7 (0.4-0.8)                    | -                      | -              | -                | -                     | -                | -                                 | 12 (86%)                 |
| Wu et al (2020) <sup>43</sup>           | 83    | 0.5 (0.4-0.8)                    | -                      | -              | -                | 1.5 (0.5-2.9)         | -                | 30 (36%)                          | -                        |
| Xu B et al (2020) <sup>44</sup>         | 107   | -                                | -                      | -              | -                | -                     | -                | -                                 | -                        |
| Xu J et al (2020) <sup>45</sup>         | 239   | -                                | -                      | -              | -                | -                     | -                | -                                 | -                        |
| Yang L et al (2020) <sup>46</sup>       | 29    | -                                | -                      | -              | -                | -                     | -                | -                                 | -                        |





# CHEST™ Online Supplement

|                                    |     |   |                      |   |   |   |   |                 |
|------------------------------------|-----|---|----------------------|---|---|---|---|-----------------|
| Yu et al (2020) <sup>47</sup>      | 226 | - | -                    | - | - | - | - | -               |
| Zhang G et al (2020) <sup>48</sup> | 55  | - | 443 (211-1304) ng/mL | - | - | - | - | 55 (100%)       |
| Zhang J et al (2020) <sup>49</sup> | 19  | - | -                    | - | - | - | - | -               |
| Zheng et al (2020) <sup>50</sup>   | 34  | - | -                    | - | - | - | - | -               |
| Zhou Y et al (2020) <sup>51</sup>  | 21  | - | -                    | - | - | - | - | -               |
| Crude prevalence/ sample size (%)  | -   | - | -                    | - | - | - | - | 381/735 (51.8%) |
|                                    |     |   |                      |   |   |   |   | 267/495 (53.9%) |

Data are median (IQR) or mean (SD), CT- computed tomography, CXR – Chest X-ray, ICNARC – Intensive Care National Audit & Research Centre, Note: Studies were excluded if they (1) did not report on when laboratory results were taken (2) report results without units (3) incomplete data.

e-Appendix 8. Severity of illness scores and organ dysfunction of ICU patients with COVID-19

| First author                            | N     | Severity of Illness score |             | Organ dysfunction      |                       |                        |                         |                        |                         |                        |                       |                           |
|-----------------------------------------|-------|---------------------------|-------------|------------------------|-----------------------|------------------------|-------------------------|------------------------|-------------------------|------------------------|-----------------------|---------------------------|
|                                         |       | SOFA                      | APACHE II   | ARDS                   | Acute Kidney injury   | Acute Cardiac injury   | Thrombotic complication | Secondary Infection    | Shock                   | Acute Liver injury     | Arrhythmia            | Neurological complication |
| Almazeedi et al (2020) <sup>63</sup>    | 42    | -                         | -           | 31 (74%) <sup>1</sup>  | 11 (26%) <sup>1</sup> | -                      | 2 (5%) <sup>17</sup>    | -                      | 7 (17%) <sup>1</sup>    | -                      | -                     | 1 (2%) <sup>32</sup>      |
| Amit et al (2020) <sup>64</sup>         | 156   | -                         | -           | 109 (70%)              | 40 (26%)              | 19 (12%)               | -                       | 27 (17%)               | 29 (19%)                | -                      | -                     | -                         |
| Arentz et al (2020) <sup>52</sup>       | 21    | -                         | -           | 21 (100%) <sup>2</sup> | 4 (19%) <sup>3</sup>  | 7 (33%) <sup>6</sup>   | -                       | 4 (19%) <sup>18</sup>  | -                       | 3 (14%) <sup>27</sup>  | -                     | 1 (5%) <sup>33</sup>      |
| Auld et al (2020) <sup>53</sup>         | 217   | 7 (5-11)                  | -           | -                      | -                     | -                      | -                       | -                      | -                       | -                      | -                     | -                         |
| Barrasa et al (2020) <sup>20</sup>      | 48    | 7 (4-8)                   | 15 (12-19)  | -                      | -                     | -                      | -                       | -                      | -                       | -                      | -                     | -                         |
| Bhatla et al (2020) <sup>54</sup>       | 79    | -                         | -           | -                      | -                     | -                      | -                       | -                      | -                       | -                      | -                     | -                         |
| Bhatraju et al (2020) <sup>55</sup>     | 24    | -                         | -           | -                      | -                     | -                      | -                       | -                      | -                       | -                      | -                     | -                         |
| Borobia et al (2020) <sup>21</sup>      | 75    | -                         | -           | -                      | -                     | -                      | -                       | -                      | -                       | -                      | -                     | -                         |
| Cardoso et al (2020) <sup>22</sup>      | 20    | 8 (7-9)                   | 18 (14-21)  | -                      | -                     | -                      | -                       | -                      | -                       | -                      | -                     | -                         |
| Chen et al (2020) <sup>37</sup>         | 51    | -                         | -           | -                      | 5 (10%)               | 10 (20%)               | -                       | -                      | -                       | 4 (8%)                 | -                     | -                         |
| Cui et al (2020) <sup>38</sup>          | 81    | -                         | -           | -                      | -                     | -                      | 20 (25%) <sup>12</sup>  | -                      | -                       | -                      | -                     | -                         |
| Cummings et al (2020) <sup>56</sup>     | 257   | 11 (8-13)                 | -           | -                      | -                     | -                      | -                       | -                      | -                       | -                      | -                     | -                         |
| Ferguson et al (2020) <sup>57</sup>     | 21    | -                         | -           | 13 (62%) <sup>2</sup>  | 4 (19%) <sup>4</sup>  | 2 (10%) <sup>7</sup>   | -                       | 7 (33%) <sup>19</sup>  | -                       | -                      | 6 (29%) <sup>30</sup> | -                         |
| Grasselli et al (2020) <sup>23</sup>    | 1715  | -                         | -           | -                      | -                     | -                      | -                       | -                      | -                       | -                      | -                     | -                         |
| Halasz et al (2020) <sup>24</sup>       | 242   | -                         | -           | -                      | -                     | -                      | -                       | -                      | -                       | -                      | -                     | -                         |
| Halvatsiotis et al (2020) <sup>25</sup> | 90    | -                         | -           | -                      | -                     | -                      | -                       | -                      | -                       | -                      | -                     | -                         |
| Helms et al (2020) <sup>26</sup>        | 150   | 8 (5-10)                  | -           | -                      | -                     | 0 (0%) <sup>8</sup>    | 28 (19%) <sup>13</sup>  | -                      | -                       | -                      | -                     | 2 (1%) <sup>34</sup>      |
| Hur et al (2020) <sup>58</sup>          | 138   | -                         | -           | -                      | -                     | -                      | -                       | -                      | -                       | -                      | -                     | -                         |
| ICNARC et al (2020) <sup>27</sup>       | 10624 | -                         | 15 (11-18)  | -                      | -                     | -                      | -                       | -                      | -                       | -                      | -                     | -                         |
| Khamis et al (2020) <sup>65</sup>       | 24    | -                         | -           | 12 (50%) <sup>2</sup>  | -                     | -                      | -                       | -                      | -                       | -                      | -                     | -                         |
| Klok et al (2020) <sup>28,29</sup>      | 184   | -                         | -           | -                      | -                     | -                      | 57 (31%) <sup>14</sup>  | -                      | -                       | -                      | -                     | -                         |
| Li J et al (2020) <sup>39</sup>         | 74    | -                         | -           | -                      | -                     | -                      | -                       | -                      | -                       | -                      | -                     | -                         |
| Ling et al (2020) <sup>40</sup>         | 8     | 6 (4-7)                   | 12.5 (9-16) | -                      | -                     | -                      | -                       | -                      | -                       | -                      | -                     | -                         |
| Llitjos et al (2020) <sup>30</sup>      | 26    | 3 (2-4-7)                 | -           | 21 (81%) <sup>1</sup>  | 9 (35%) <sup>1</sup>  | -                      | 6 (23%) <sup>15</sup>   | -                      | -                       | 4 (15%) <sup>1</sup>   | -                     | -                         |
| Longchamp et al (2020) <sup>31</sup>    | 25    | -                         | -           | -                      | -                     | -                      | 11 (44%) <sup>16</sup>  | -                      | -                       | -                      | -                     | -                         |
| Maatman et al (2020) <sup>59</sup>      | 109   | -                         | -           | -                      | -                     | -                      | -                       | -                      | -                       | -                      | -                     | -                         |
| Mitra et al (2020) <sup>60</sup>        | 117   | 6 (2-11)                  | 18 (10-28)  | -                      | -                     | -                      | -                       | -                      | -                       | -                      | -                     | -                         |
| Myers et al (2020) <sup>61</sup>        | 113   | -                         | -           | -                      | -                     | -                      | -                       | -                      | -                       | -                      | -                     | -                         |
| Pavoni et al (2020) <sup>32</sup>       | 40    | 4 (1)                     | -           | -                      | -                     | -                      | -                       | -                      | -                       | -                      | -                     | -                         |
| Pedersen et al (2020) <sup>33</sup>     | 16    | -                         | -           | -                      | -                     | -                      | -                       | -                      | -                       | -                      | -                     | -                         |
| Richardson et al (2020) <sup>62</sup>   | 373   | -                         | -           | -                      | -                     | -                      | -                       | -                      | -                       | -                      | -                     | -                         |
| Rodriguez et al (2020) <sup>34</sup>    | 43    | 6 (4-7)                   | 18 (15-24)  | 40 (93%) <sup>2</sup>  | 18 (42%) <sup>5</sup> | -                      | -                       | 13 (30%) <sup>20</sup> | 25 (58%) <sup>24</sup>  | -                      | -                     | -                         |
| Simonnet et al (2020) <sup>35</sup>     | 124   | -                         | -           | -                      | -                     | -                      | -                       | -                      | -                       | -                      | -                     | -                         |
| Thomas et al (2020) <sup>36</sup>       | 63    | -                         | -           | -                      | -                     | -                      | -                       | -                      | -                       | -                      | -                     | -                         |
| Wang Y et al (2020) <sup>41</sup>       | 344   | -                         | -           | 145 (42%) <sup>2</sup> | 86 (25%) <sup>3</sup> | 111 (32%) <sup>9</sup> | 71 (21%) <sup>17</sup>  | -                      | 114 (33%) <sup>25</sup> | 54 (16%) <sup>28</sup> | -                     | -                         |
| Wei et al (2020) <sup>42</sup>          | 14    | -                         | -           | -                      | -                     | -                      | -                       | -                      | -                       | -                      | -                     | -                         |

Online supplements are not copyedited prior to posting and the author(s) take full responsibility for the accuracy of all data.

# CHEST™ Online Supplement

|                                    |     |         |            |                        |                       |                        |                 |                        |                        |                        |                       |              |
|------------------------------------|-----|---------|------------|------------------------|-----------------------|------------------------|-----------------|------------------------|------------------------|------------------------|-----------------------|--------------|
| Wu et al (2020) <sup>43</sup>      | 83  | -       | -          | -                      | -                     | -                      | -               | 5 (6%) <sup>21</sup>   | -                      | -                      | -                     | -            |
| Xu B et al (2020) <sup>44</sup>    | 107 | -       | -          | -                      | -                     | -                      | -               | -                      | -                      | -                      | -                     | -            |
| Xu J et al (2020) <sup>45</sup>    | 239 | 6 (5-7) | 15 (13-17) | 164 (69%)              | 119 (50%)             | 103 (43%)              | -               | 40 (17%)               | -                      | 191 (80%)              | -                     | -            |
| Yang L et al (2020) <sup>46</sup>  | 29  | -       | -          | 21 (72%) <sup>1</sup>  | 12 (41%) <sup>1</sup> | 15 (52%) <sup>1</sup>  | -               | 5 (17%) <sup>1</sup>   | 4 (14%) <sup>1</sup>   | -                      | -                     | -            |
| Yu et al (2020) <sup>47</sup>      | 226 | 4 (2-8) | -          | 161 (71%) <sup>2</sup> | 57 (26%) <sup>3</sup> | 61 (27%) <sup>10</sup> | -               | 49 (22%) <sup>22</sup> | 36 (16%) <sup>26</sup> | -                      | 21 (9%) <sup>31</sup> | -            |
| Zhang G et al (2020) <sup>48</sup> | 55  | -       | -          | 48 (87%) <sup>1</sup>  | 8 (15%) <sup>1</sup>  | 16 (29%) <sup>1</sup>  | -               | 9 (16%) <sup>23</sup>  | 15 (27%) <sup>1</sup>  | -                      | 22 (40%) <sup>1</sup> | -            |
| Zhang J et al (2020) <sup>49</sup> | 19  | -       | -          | -                      | -                     | -                      | -               | -                      | -                      | -                      | -                     | -            |
| Zheng et al (2020) <sup>50</sup>   | 34  | -       | -          | 33 (97%) <sup>2</sup>  | 7 (21%) <sup>3</sup>  | 13 (38%) <sup>11</sup> | -               | -                      | -                      | 14 (41%) <sup>29</sup> | -                     | -            |
| Zhou Y et al (2020) <sup>51</sup>  | 21  | -       | -          | -                      | -                     | -                      | -               | -                      | -                      | -                      | -                     | -            |
| Crude prevalence/ sample size (%)  | -   | -       | -          | 819/1260 (65.0%)       | 380/1287 (30.2%)      | 357/1326 (26.9%)       | 195/852 (22.9%) | 159/873 (18.2%)        | 230/895 (25.7%)        | 270/715 (37.8%)        | 49/302 (16.2%)        | 4/213 (1.9%) |

Data are n (%), ARDS – Acute Respiratory Distress Syndrome, ICNARC – Intensive Care National Audit & Research Centre <sup>1</sup>Not Defined by authors <sup>2</sup> Berlin criteria, <sup>3</sup> KDIGO classification, <sup>4</sup> increase in serum Creatinine during admission of 1.5times baseline, <sup>5</sup> RIFLE classification <sup>6</sup>evidence of a globally decreased left ventricular systolic function on transthoracic echocardiogram in addition to clinical signs of cardiogenic shock, an elevation of level in creatinine kinase or troponin, or a decrease in central venous oxygen saturation (<70%) without a past history of systolic dysfunction, <sup>7</sup> ejection fraction<50% after previously normal ejection fraction on echocardiogram in the preceding 2 years and/or >10% decrease in ejection fraction from baseline, <sup>8</sup> elevation in high sensitivity cardiac troponin levels above the 99<sup>th</sup> percentile, <sup>9</sup> cardiac biomarkers or new abnormalities in electrocardiography and echocardiography, <sup>10</sup> hs-TnI >28ng/L or TnI >0.3ng/ml, <sup>11</sup>blood levels of hypersensitive troponin I above the 99<sup>th</sup> percentile upper reference limit (>28pg/ml) or new abnormalities shown on electrocardiography and echocardiography, <sup>12</sup>venous thromboembolism, <sup>13</sup>pulmonary embolism and lower-extremity deep venous thrombosis, <sup>14</sup>pulmonary embolism, deep vein thrombosis, <sup>15</sup>upper extremity thrombosis, arterial thrombotic events (all ischaemic strokes), <sup>16</sup>pulmonary embolism, <sup>17</sup>pulmonary embolism, proximal lower-extremity DVT, <sup>18</sup>disseminated intravascular coagulation defined per the International Society of Thrombosis and Haemostasis, <sup>19</sup>pseudomonas bacteraemia Influenza A and parainfluenza type 3, <sup>20</sup>ventilator or hospital-associated pneumonia and catheter-related bloodstream infection, <sup>21</sup>ventilator associated pneumonia, <sup>22</sup>defined as cultures for nine kinds of respiratory pathogens including virus, bacteria and fungi, <sup>23</sup>hospital acquired infection with patients having concomitant pneumonia, blood stream infections and deep soft tissue infection, <sup>24</sup>hospital acquired infection, <sup>25</sup>the presence of shock on admission was considered as the need for a dose of noradrenaline within the first 6 hours after admission to maintain mean arterial pressure, <sup>26</sup>septic shock defined according to the 2016 third international consensus, <sup>27</sup>septic shock defined according to the sepsis-3 criteria, <sup>28</sup>alanine aminotransferase or aspartate aminotransferase level greater than 3 times the upper limit of normal, <sup>29</sup>diagnosed according to elevation of bilirubin and aminotransferase, <sup>30</sup>acute liver injury defined as an increase in alanine aminotransferase (ALT) over two times the upper limit of the normal range (ULN) or an increase in conjugated bilirubin or a combined increase in aspartate aminotransferase (AST), alkaline phosphatase and total bilirubin provided that one of them was above two times ULN, <sup>31</sup>atrial fibrillation, supraventricular tachycardia, bradycardia, <sup>32</sup>atrial fibrillation, supraventricular tachycardia, ventricular tachycardia, <sup>33</sup>Encephalopathy/Encephalitis, <sup>34</sup>seizures, <sup>35</sup>Cerebral Ischemic att

## e-Appendix 9. Interventions and Treatment of ICU patients with COVID-19

| First author                            | N     | Interventions                   |                          |              |          | Treatment  |               |           |                |           |
|-----------------------------------------|-------|---------------------------------|--------------------------|--------------|----------|------------|---------------|-----------|----------------|-----------|
|                                         |       | Invasive mechanical ventilation | Non-invasive ventilation | Vasopressors | ECMO     | RRT        | Antimicrobial | Antiviral | Glucocorticoid | IVIG      |
| Almazeedi et al (2020) <sup>63</sup>    | 42    | -                               | -                        | -            | 8 (19%)  | 4 (10%)    | 42 (100%)     | 35 (83%)  | 7 (17%)        | -         |
| Amit et al (2020) <sup>64</sup>         | 156   | 93 (60%)                        | 39 (25%)                 | 78 (50%)     | 6 (4%)   | 14 (9%)    | 131 (84%)     | 31 (20%)  | 34 (22%)       | 7 (4%)    |
| Arentz et al (2020) <sup>52</sup>       | 21    | 15 (71%)                        | 4 (19%)                  | 14 (67%)     | -        | -          | -             | -         | -              | -         |
| Auld et al (2020) <sup>53</sup>         | 217   | 165 (76%)                       | -                        | 143 (66%)    | 4 (2%)   | 63 (29%)   | -             | -         | -              | -         |
| Barrasa et al (2020) <sup>20</sup>      | 48    | 45 (94%)                        | -                        | -            | 1 (2%)   | -          | 42 (88%)      | 45 (94%)  | 17 (35%)       | -         |
| Bhatla et al (2020) <sup>54</sup>       | 79    | -                               | -                        | -            | -        | -          | -             | 20 (25%)  | -              | -         |
| Bhatraju et al (2020) <sup>55</sup>     | 24    | 18 (75%)                        | 0 (0%)                   | 17 (71%)     | 0 (0%)   | -          | -             | 8 (33%)   | 0 (0%)         | -         |
| Borobia et al (2020) <sup>21</sup>      | 75    | -                               | -                        | -            | -        | -          | -             | -         | -              | -         |
| Cardoso et al (2020) <sup>22</sup>      | 20    | 20 (100%)                       | 0 (0%)                   | 19 (95%)     | -        | 7 (35%)    | -             | -         | -              | -         |
| Chen et al (2020) <sup>37</sup>         | 51    | 14 (27%)                        | 6 (12%)                  | 31 (61%)     | 2 (4%)   | 3 (6%)     | 51 (100%)     | 51 (100%) | 48 (94%)       | 28 (55%)  |
| Cui et al (2020) <sup>38</sup>          | 81    | -                               | -                        | -            | -        | -          | -             | -         | -              | -         |
| Cummings et al (2020) <sup>56</sup>     | 257   | 203 (79%)                       | -                        | 170 (66%)    | 6 (3%)   | 79 (31%)   | 229 (89%)     | 23 (9%)   | 68 (26%)       | -         |
| Ferguson et al (2020) <sup>57</sup>     | 21    | -                               | -                        | 13 (62%)     | -        | 4 (19%)    | 19 (91%)      | 16 (76%)  | 2 (10%)        | -         |
| Grasselli et al (2020) <sup>23</sup>    | 1715  | -                               | -                        | -            | -        | -          | -             | -         | -              | -         |
| Halasz et al (2020) <sup>24</sup>       | 242   | -                               | -                        | -            | -        | -          | -             | -         | -              | -         |
| Halvatsiotis et al (2020) <sup>25</sup> | 90    | 82 (91%)                        | -                        | -            | -        | -          | -             | -         | -              | -         |
| Helms et al (2020) <sup>26</sup>        | 150   | 150 (100%)                      | -                        | -            | 12 (8%)  | -          | -             | -         | -              | -         |
| Hur et al (2020) <sup>58</sup>          | 138   | -                               | -                        | -            | -        | -          | 132 (96%)     | -         | -              | -         |
| ICNARC et al (2020) <sup>27</sup>       | 10624 | 7425 (70%)                      | -                        | -            | -        | 2738 (27%) | -             | -         | -              | -         |
| Khamis et al (2020) <sup>65</sup>       | 24    | 15 (62%)                        | 0 (0%)                   | -            | -        | 6 (25%)    | -             | 24 (100%) | 13 (54%)       | -         |
| Klok et al (2020) <sup>28,29</sup>      | 184   | -                               | -                        | -            | -        | 23 (13%)   | -             | -         | -              | -         |
| Li J et al (2020) <sup>39</sup>         | 74    | 6 (8%)                          | 14 (19%)                 | -            | 2 (3%)   | -          | 68 (92%)      | 74 (100%) | 70 (95%)       | -         |
| Ling et al (2020) <sup>40</sup>         | 8     | 6 (75%)                         | -                        | 6 (75%)      | 0 (0%)   | 2 (25%)    | -             | -         | -              | -         |
| Llitjos et al (2020) <sup>30</sup>      | 26    | -                               | -                        | 23 (88%)     | 2 (8%)   | 4 (15%)    | 25 (96%)      | -         | -              | -         |
| Longchamp et al (2020) <sup>31</sup>    | 25    | 23 (92%)                        | -                        | 19 (76%)     | -        | -          | -             | -         | -              | -         |
| Maatman et al (2020) <sup>59</sup>      | 109   | -                               | -                        | -            | -        | -          | 109 (100%)    | -         | -              | -         |
| Mitra et al (2020) <sup>60</sup>        | 117   | 74 (63%)                        | 15 (13%)                 | -            | 3 (3%)   | -          | -             | 0(0%)     | 28 (24%)       | -         |
| Myers et al (2020) <sup>61</sup>        | 113   | 103 (91%)                       | 1 (1%)                   | -            | -        | -          | -             | -         | 14 (12%)       | -         |
| Pavoni et al (2020) <sup>32</sup>       | 40    | -                               | -                        | -            | -        | -          | -             | -         | -              | -         |
| Pedersen et al (2020) <sup>33</sup>     | 16    | 16 (100%)                       | -                        | -            | -        | -          | 16 (100%)     | -         | -              | -         |
| Richardson et al (2020) <sup>62</sup>   | 373   | 320 (86%)                       | -                        | -            | -        | -          | -             | -         | -              | -         |
| Rodriguez et al (2020) <sup>34</sup>    | 43    | -                               | -                        | -            | -        | -          | -             | -         | -              | -         |
| Simonnet et al (2020) <sup>35</sup>     | 124   | 85 (69%)                        | -                        | -            | -        | -          | -             | -         | -              | -         |
| Thomas et al (2020) <sup>36</sup>       | 63    | 52 (83%)                        | -                        | -            | -        | 23 (37%)   | -             | -         | -              | -         |
| Wang Y et al (2020) <sup>41</sup>       | 344   | 100 (29%)                       | 34 (10%)                 | -            | -        | -          | -             | -         | -              | -         |
| Wei et al (2020) <sup>42</sup>          | 14    | -                               | -                        | -            | -        | -          | -             | -         | -              | -         |
| Wu et al (2020) <sup>43</sup>           | 83    | -                               | -                        | -            | 12 (14%) | -          | 83 (100%)     | 83 (100%) | -              | 68 (81%)  |
| Xu B et al (2020) <sup>44</sup>         | 107   | -                               | -                        | -            | -        | -          | 103 (96%)     | -         | 84 (79%)       | 65 (61%)  |
| Xu J et al (2020) <sup>45</sup>         | 239   | 79 (33%)                        | 86 (36%)                 | -            | 9 (4%)   | 12 (5%)    | 229 (96%)     | 132 (55%) | 189 (79%)      | 138 (58%) |
| Yang L et al (2020) <sup>46</sup>       | 29    | 14 (48%)                        | -                        | -            | -        | 2 (7%)     | 29 (100%)     | 28 (97%)  | 20 (69%)       | -         |
| Yu et al (2020) <sup>47</sup>           | 226   | 85 (38%)                        | 20 (9%)                  | 48 (21%)     | 14 (6%)  | 24 (11%)   | 168 (74%)     | 117 (51%) | 37 (16%)       | 29 (13%)  |
| Zhang G et al (2020) <sup>48</sup>      | 55    | 16 (29%)                        | 25 (45%)                 | -            | 10 (18%) | 4 (7%)     | -             | 50 (91%)  | 40 (73%)       | -         |
| Zhang J et al (2020) <sup>49</sup>      | 19    | -                               | -                        | -            | -        | -          | -             | -         | -              | -         |
| Zheng et al (2020) <sup>50</sup>        | 34    | 15 (44%)                        | 19 (56%)                 | -            | 11 (32%) | 5 (15%)    | 30 (88%)      | 33 (97%)  | 33 (97%)       | 27 (79%)  |
| Zhou Y et al (2020) <sup>51</sup>       | 21    | 8 (38%)                         | 13 (62%)                 | -            | 1 (5%)   | -          | 20 (95%)      | 21 (100%) | -              | 3 (14%)   |

# CHEST™ Online Supplement

---

|                                  |                       |                     |                     |                        |                       |                      |                     |                     |                    |
|----------------------------------|-----------------------|---------------------|---------------------|------------------------|-----------------------|----------------------|---------------------|---------------------|--------------------|
| Crude prevalence/<br>size<br>(%) | 9247/13543<br>(68.3%) | 276/1519<br>(18.2%) | 581/1052<br>(55.2%) | 103/18<br>28<br>(5.6%) | 3017/12271<br>(24.6%) | 1526/1677<br>(91.0%) | 791/1580<br>(50.1%) | 704/1617<br>(43.5%) | 365/917<br>(39.8%) |
|----------------------------------|-----------------------|---------------------|---------------------|------------------------|-----------------------|----------------------|---------------------|---------------------|--------------------|

---

Data are median (IQR) or mean (SD) or n (%), APACHE – Acute Physiology and Chronic Health Evaluation, ECMO – ExtraCorporeal Membrane Oxygenation, ICNARC - Intensive Care National Audit & Research Centre, ICU –Intensive Care Unit, IVIG – Intravenous Immunoglobulin, RRT – Renal Replacement Therapy, SOFA – Sequential Organ Failure Assessment on admission: as defined by the authors

## e-Appendix 10. Outcomes and disposition of ICU patients with COVID-19

| First author                            | N     | Outcomes       |                    | Disposition           |                    |                          |
|-----------------------------------------|-------|----------------|--------------------|-----------------------|--------------------|--------------------------|
|                                         |       | ICU LOS , days | Hospital LOS, days | In-Hospital mortality | Remain in Hospital | Discharged from Hospital |
| Almazeedi et al (2020) <sup>63</sup>    | 42    | -              | -                  | 17 (41%)              | 19 (45%)           | 6 (14%)                  |
| Amit et al (2020) <sup>64</sup>         | 156   | 10 (5-17)      | -                  | 87 (56%)              | 0 (0%)             | 69 (44%)                 |
| Arentz et al (2020) <sup>52</sup>       | 21    | -              | -                  | 11 (52%)              | 10 (48%)           | -                        |
| Auld et al (2020) <sup>53</sup>         | 217   | 9 (5-15)       | 15 (9-24)          | 67 (31%)              | 19 (9%)            | 131 (60%)                |
| Barrasa et al (2020) <sup>20</sup>      | 48    | -              | -                  | 14 (29%)              | 21 (44%)           | 13 (27%)                 |
| Bhatia et al (2020) <sup>54</sup>       | 79    | -              | -                  | 18 (23%)              | -                  | -                        |
| Bhatraju et al (2020) <sup>55</sup>     | 24    | 9 (4-14)       | 12 (8-18)          | 12 (50%)              | 7 (29%)            | 5 (21%)                  |
| Borobia et al (2020) <sup>21</sup>      | 75    | -              | -                  | 55 (70%)              | -                  | 20 (25%)                 |
| Cardoso et al (2020) <sup>22</sup>      | 20    | 10-3 (8-12)    | 22-4 (14.1-26.7)   | 3 (15%)               | -                  | -                        |
| Chen et al (2020) <sup>37</sup>         | 51    | -              | 20 (16-26)         | 3 (6%)                | 2 (4%)             | 46 (90%)                 |
| Cui et al (2020) <sup>38</sup>          | 81    | -              | -                  | 8 (10%)               | 9 (11%)            | 64 (79%)                 |
| Cummings et al (2020) <sup>56</sup>     | 257   | -              | -                  | 101 (39%)             | 98 (39%)           | 58 (23%)                 |
| Ferguson et al (2020) <sup>57</sup>     | 21    | 12 (5-28)      | 17(11-30)          | 3 (14%)               | 4 (19%)            | 14 (67%)                 |
| Grasselli et al (2020) <sup>23</sup>    | 1715  | 12 (7-20)      | 22 (12-42)         | 915 (53%)             | 127 (7%)           | 673 (93%)                |
| Halasz et al (2020) <sup>24</sup>       | 242   | -              | -                  | 78 (32%)              | -                  | -                        |
| Halvatsiotis et al (2020) <sup>25</sup> | 90    | -              | -                  | 26 (29%)              | -                  | -                        |
| Helms et al (2020) <sup>26</sup>        | 150   | 9.5 (4-6)      | -                  | 13 (9%)               | 101 (67%)          | 36 (54%)                 |
| Hur et al (2020) <sup>58</sup>          | 138   | -              | -                  | 21 (15%)              | 65 (47%)           | 52 (38%)                 |
| ICNARC et al (2020) <sup>27</sup>       | 10624 | -              | -                  | 4405 (42%)            | 731 (7%)           | 5488 (52%)               |
| Khamis et al (2020) <sup>65</sup>       | 24    | -              | -                  | 5 (19%)               | -                  | -                        |
| Klok et al (2020) <sup>28,29</sup>      | 184   | -              | -                  | 41 (22%)              | 65 (35%)           | 78 (43%)                 |
| Li J et al (2020) <sup>39</sup>         | 74    | -              | 15 (11-22)         | 14 (19%)              | 5 (7%)             | 55 (81%)                 |
| Ling et al (2020) <sup>40</sup>         | 8     | 12 (8-16)      | -                  | 1 (13%)               | 6 (75%)            | 1(13%)                   |
| Litjens et al (2020) <sup>30</sup>      | 26    | -              | -                  | 3 (12%)               | -                  | -                        |
| Longchamp et al (2020) <sup>31</sup>    | 25    | -              | -                  | 5 (20%)               | -                  | -                        |
| Maatman et al (2020) <sup>59</sup>      | 109   | -              | -                  | 27 (25%)              | 7 (6%)             | 75 (69%)                 |
| Mitra et al (2020) <sup>60</sup>        | 117   | 9 (5-21)       | 18 (11-30)         | 18 (15%)              | 28 (24%)           | 71 (61%)                 |
| Myers et al (2020) <sup>61</sup>        | 113   | -              | -                  | 34 (38%)              | 22 (24%)           | 34 (38%)                 |
| Pavoni et al (2020) <sup>32</sup>       | 40    | 8 (2.3)        | 22.3 (5.5)         | 5 (13%)               | -                  | -                        |
| Pedersen et al (2020) <sup>33</sup>     | 16    | 14 (9)         | -                  | 7 (44%)               | -                  | -                        |
| Richardson et al (2020) <sup>62</sup>   | 373   | -              | -                  | 291 (78%)             | 0 (0%)             | 82 (22%)                 |
| Rodriguez et al (2020) <sup>34</sup>    | 43    | -              | -                  | 10 (23%)              | 5 (12%)            | 28 (65%)                 |
| Simonnet et al (2020) <sup>35</sup>     | 124   | -              | -                  | 18 (15%)              | 46 (37%)           | 60 (48%)                 |
| Thomas et al (2020) <sup>36</sup>       | 63    | -              | -                  | 10 (16%)              | -                  | -                        |
| Wang Y et al (2020) <sup>41</sup>       | 344   | -              | -                  | 133 (39%)             | 26 (8%)            | 185 (54%)                |
| Wei et al (2020) <sup>42</sup>          | 14    | -              | -                  | 5 (36%)               | 5 (36%)            | 4 (29%)                  |
| Wu et al (2020) <sup>43</sup>           | 83    | -              | -                  | 0 (0%)                | 51 (62%)           | 32 (39%)                 |
| Xu B et al (2020) <sup>44</sup>         | 107   | -              | -                  | 28 (26%)              | 30 (28%)           | 49 (46%)                 |
| Xu J et al (2020) <sup>45</sup>         | 239   | -              | 17 (10-26)         | 147 (62%)             | 0 (0%)             | 92 (38%)                 |
| Yang L et al (2020) <sup>46</sup>       | 29    | -              | -                  | 14 (48%)              | 11 (38%)           | 4 (14%)                  |
| Yu et al (2020) <sup>47</sup>           | 226   | -              | -                  | 87 (39%)              | 15 (7%)            | 124 (55%)                |
| Zhang G et al (2020) <sup>48</sup>      | 55    | -              | -                  | 12 (22%)              | 36 (66%)           | 7 (13%)                  |
| Zhang J et al (2020) <sup>49</sup>      | 19    | -              | -                  | 8 (42%)               | -                  | -                        |
| Zheng et al (2020) <sup>50</sup>        | 34    | -              | -                  | 0 (0%)                | 14 (41%)           | 20 (59%)                 |
| Zhou Y et al (2020) <sup>51</sup>       | 21    | -              | -                  | 3 (14%)               | 5 (24%)            | 13 (62%)                 |
| Crude prevalence/ sample size (%)       |       | -              | -                  | 6783/16561 (41.0%)    | 1590/15842 (10.0%) | 7689/15896 (48.4%)       |

## e-Appendix 11. Forest plots of length of Stay of ICU patients with COVID-19

### e-Appendix 11A. Intensive Care Unit (ICU) length of Stay

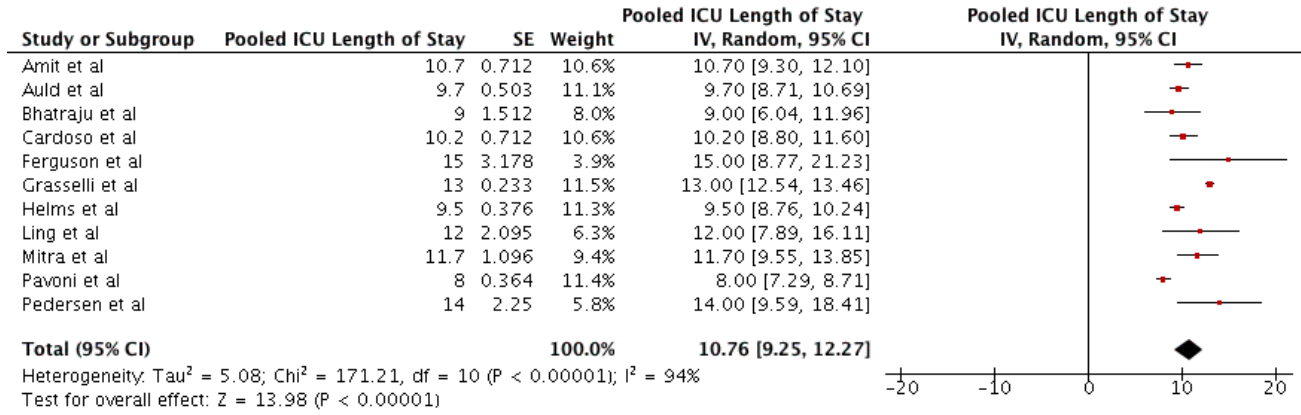

### e-Appendix 11B. Hospital length of stay

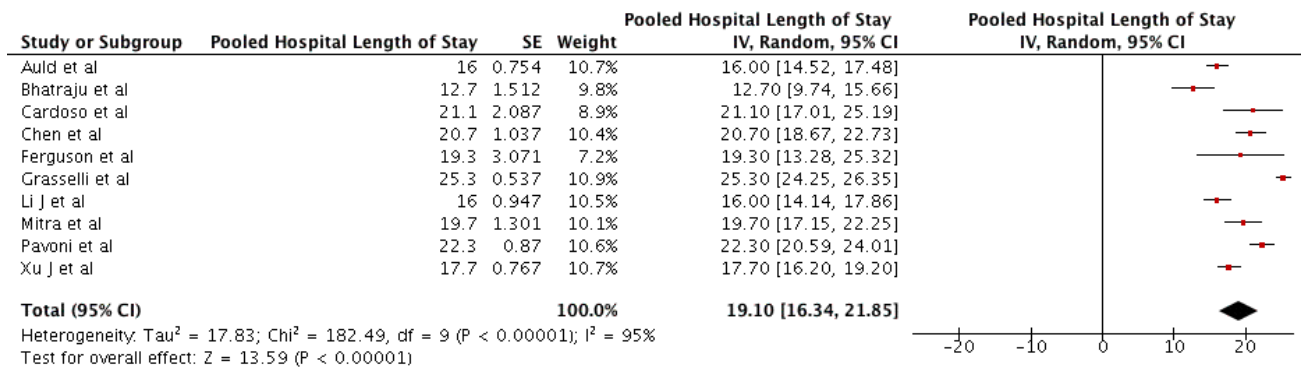

## e-Appendix 12. Forrest plot of mortality by gender of ICU patients with COVID-19

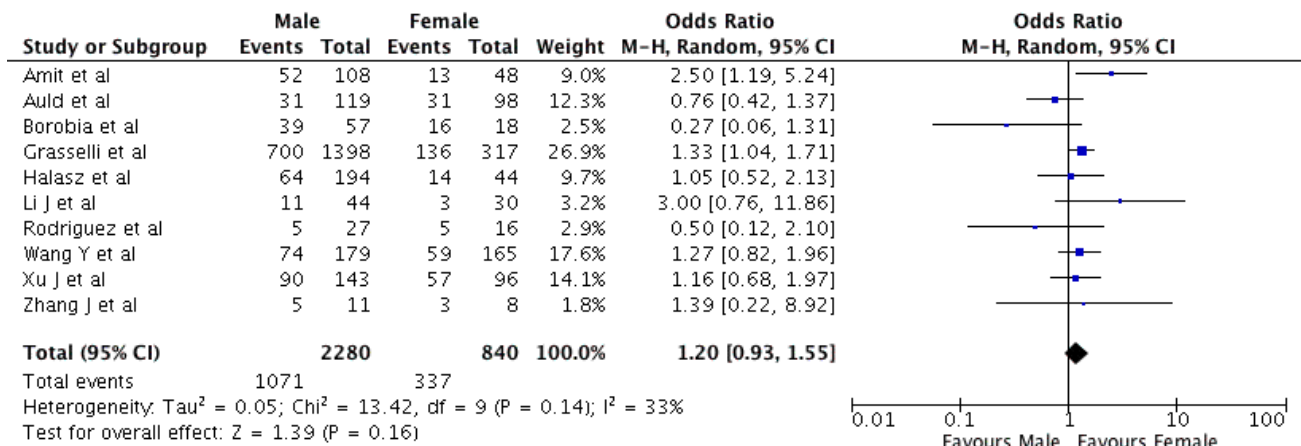

e-Appendix 13. Funnel plot for in-hospital mortality of ICU patients with COVID-19

e-Appendix 13A. Funnel plot to assess for publication bias

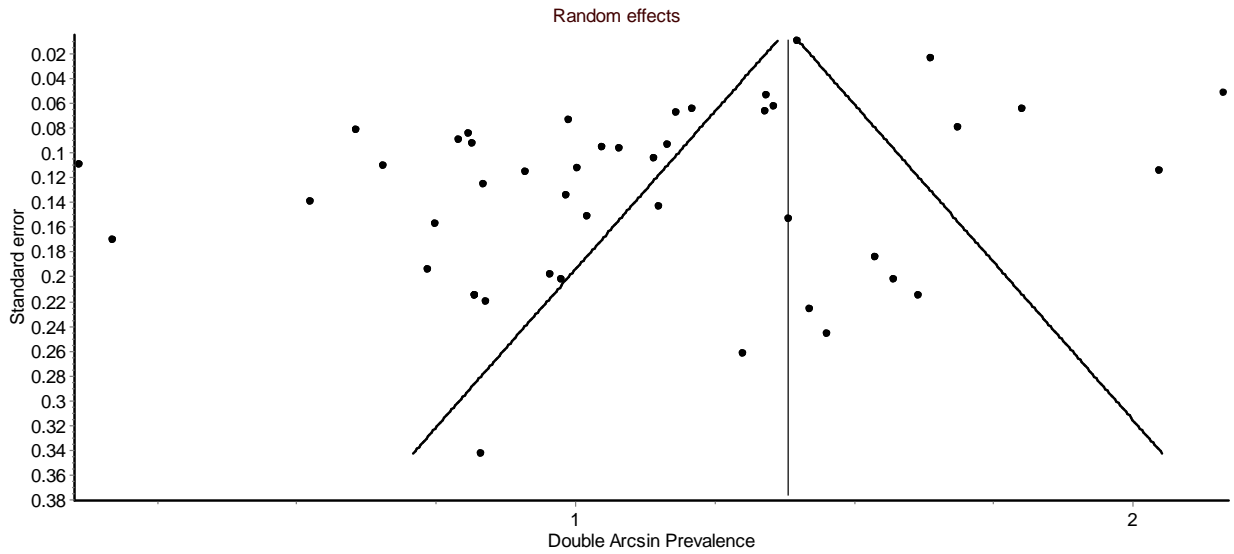

e-Appendix 13B. Doi plot analysis and LFK index to assess for publication bias

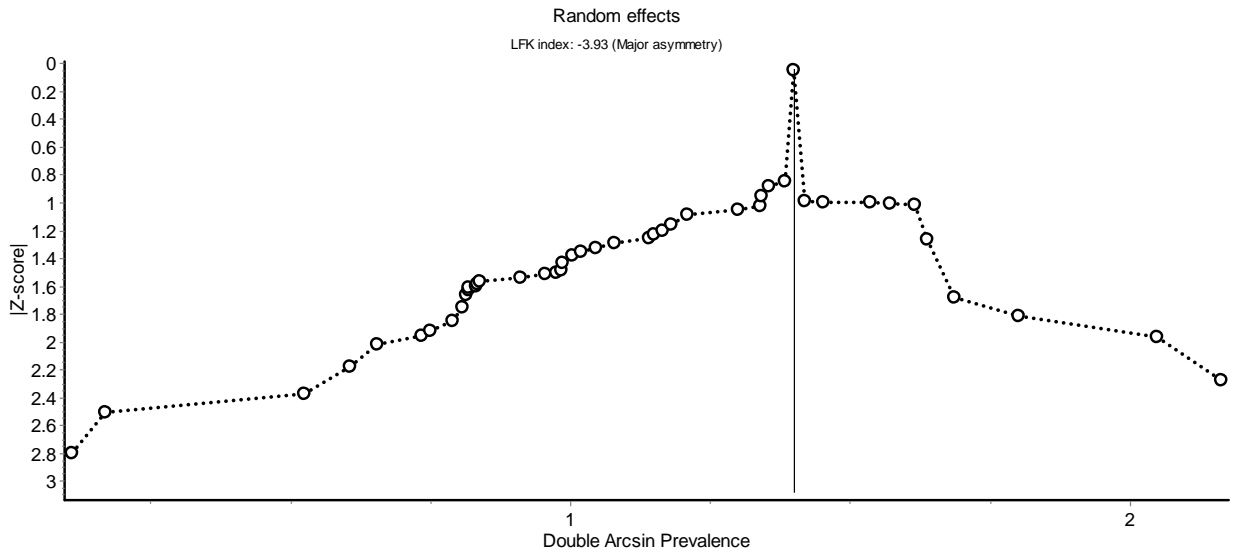



## e-Appendix 14. Subgroup analyses of mortality of ICU patients with COVID-19

### e-Appendix 14A. Subgroups based on geographical distribution (Europe versus Asia versus North America versus Middle East)

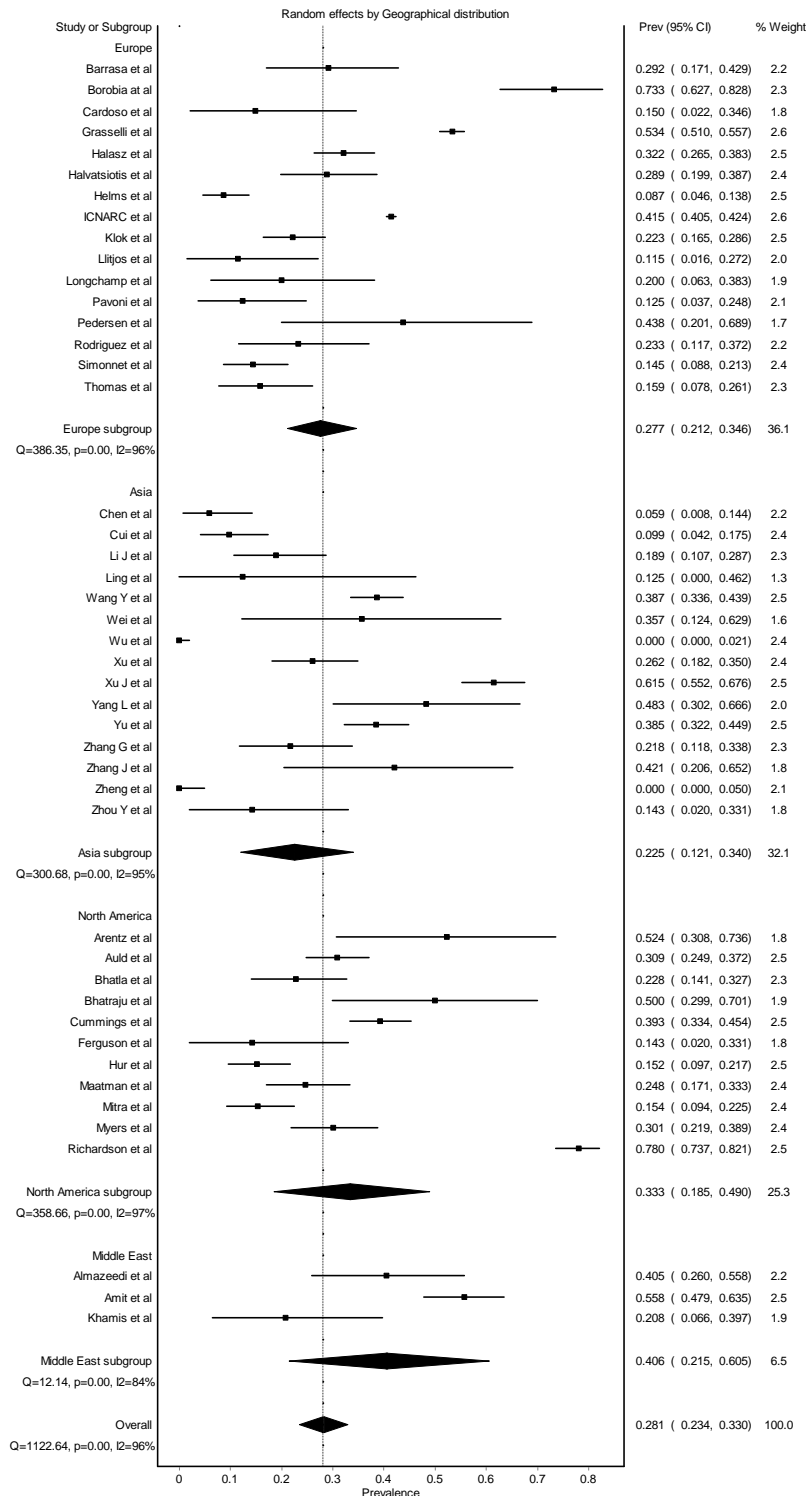

e-Appendix 14B. Subgroups based on Quality assessment – Risk of bias (High versus Low)

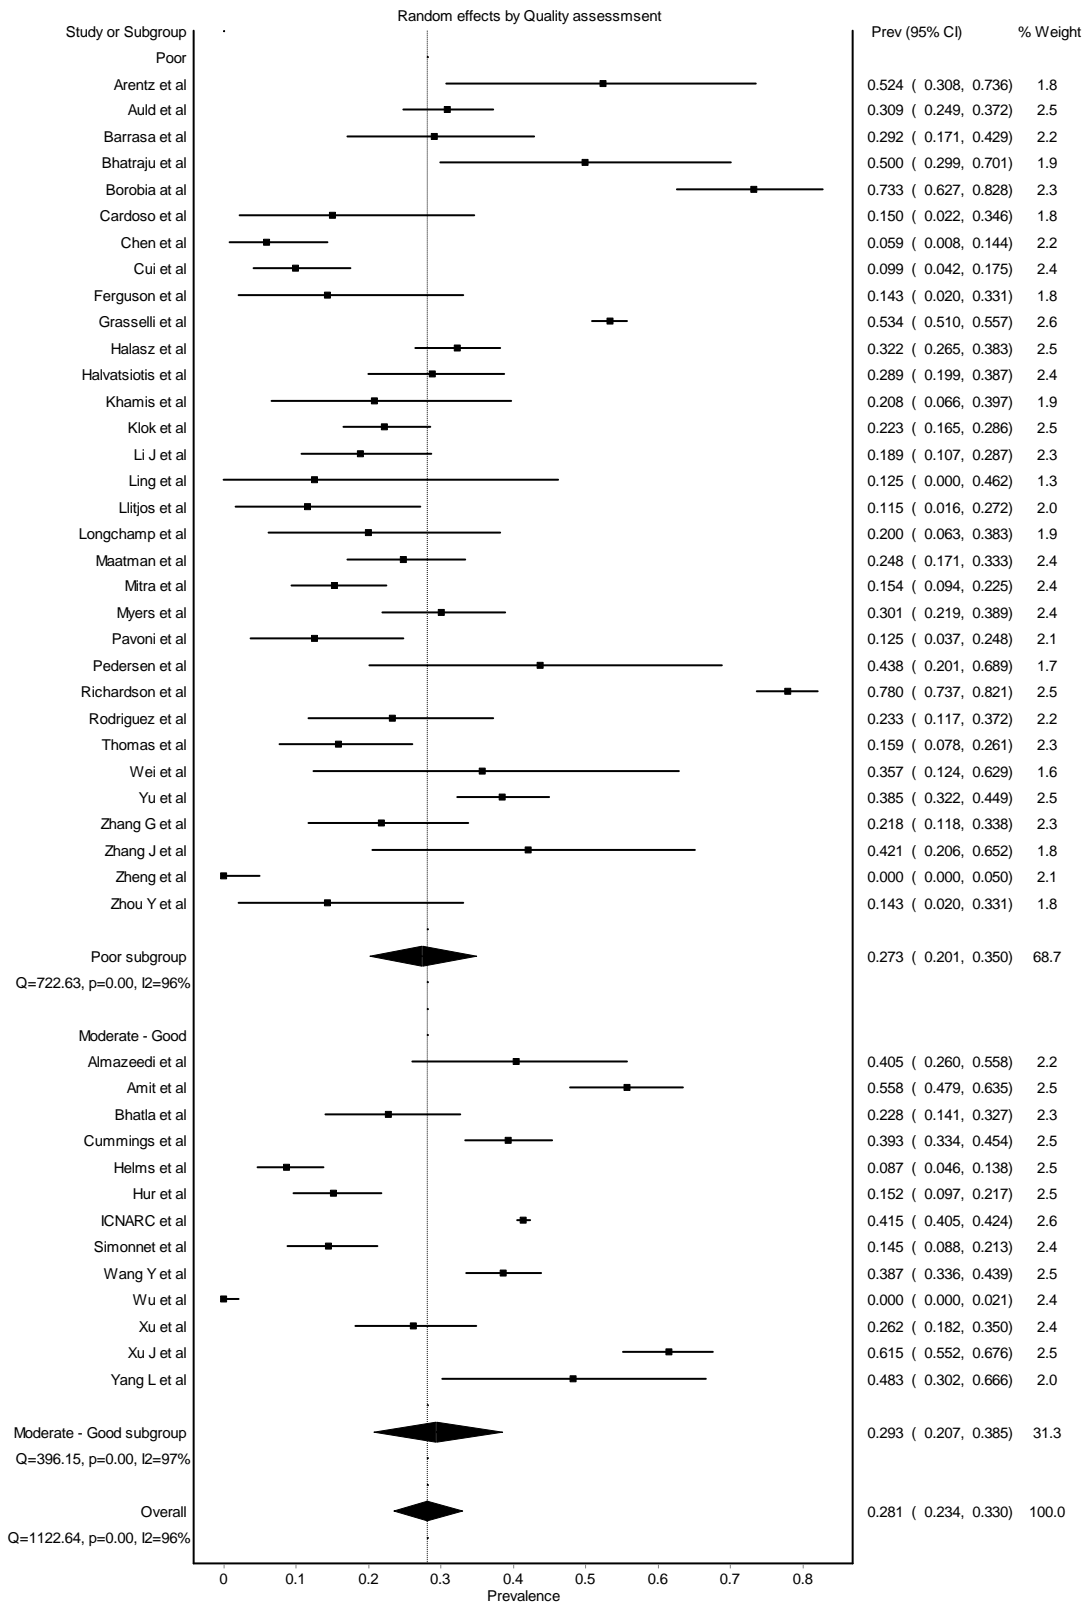

e-Appendix 14C. Subgroups based on sample size (>150 versus <150)

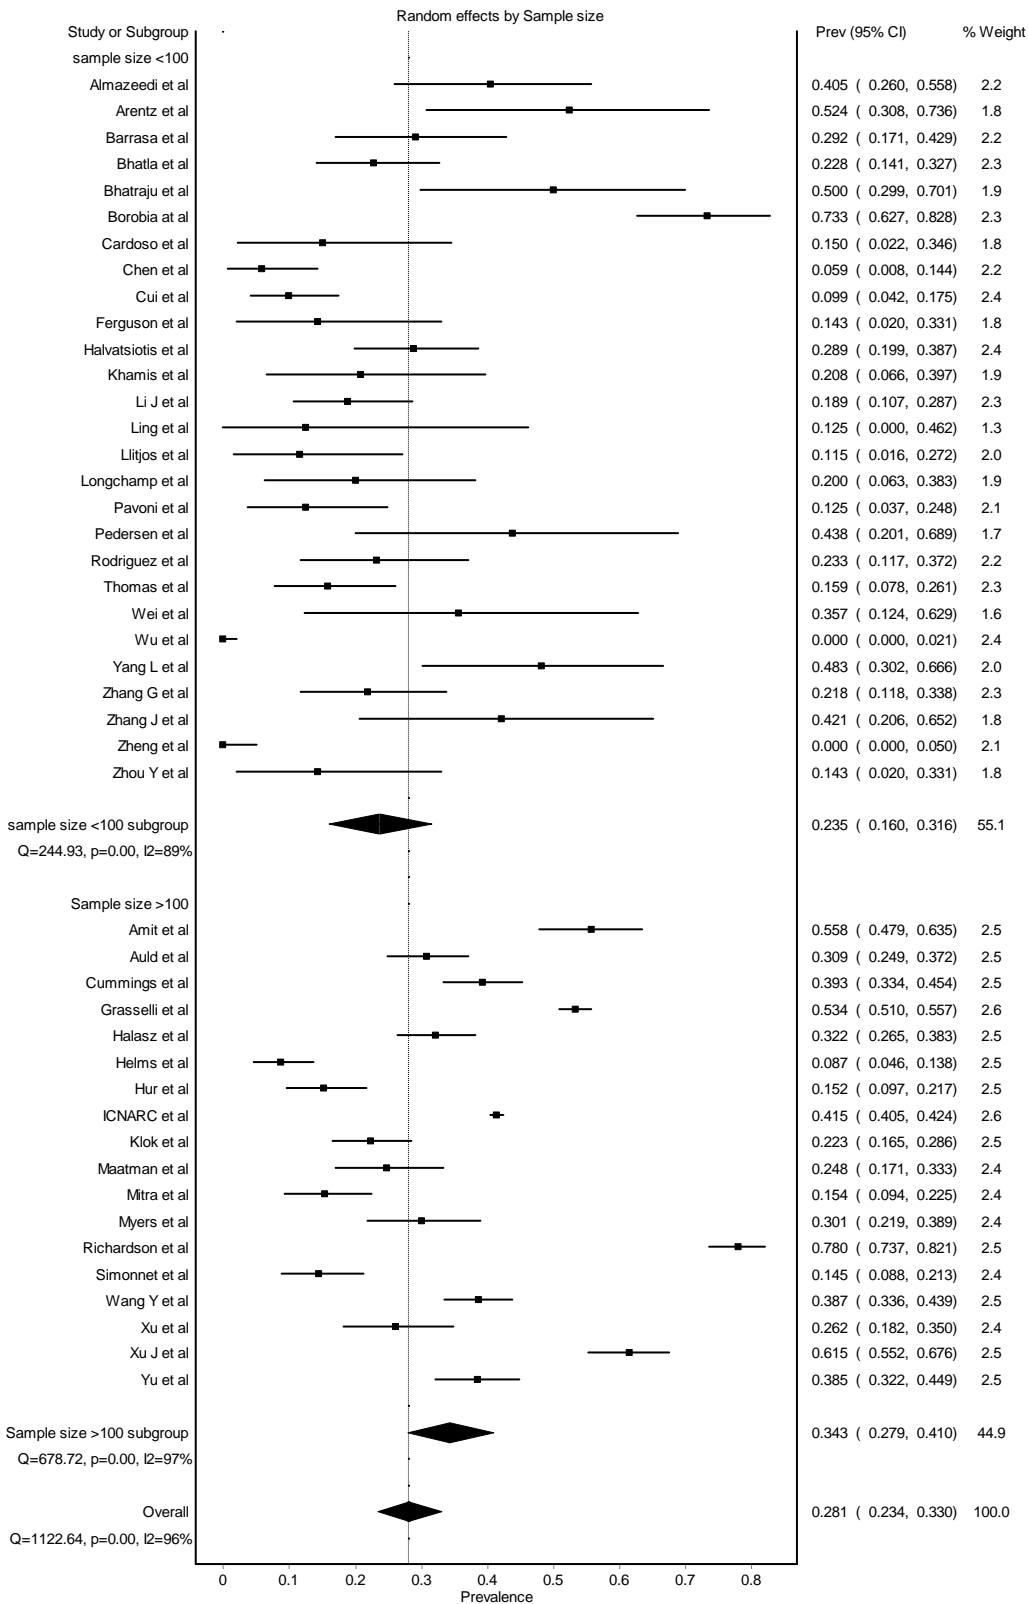

## e-Appendix 14D. Subgroups based on centre-type (multi-centre versus single centre)

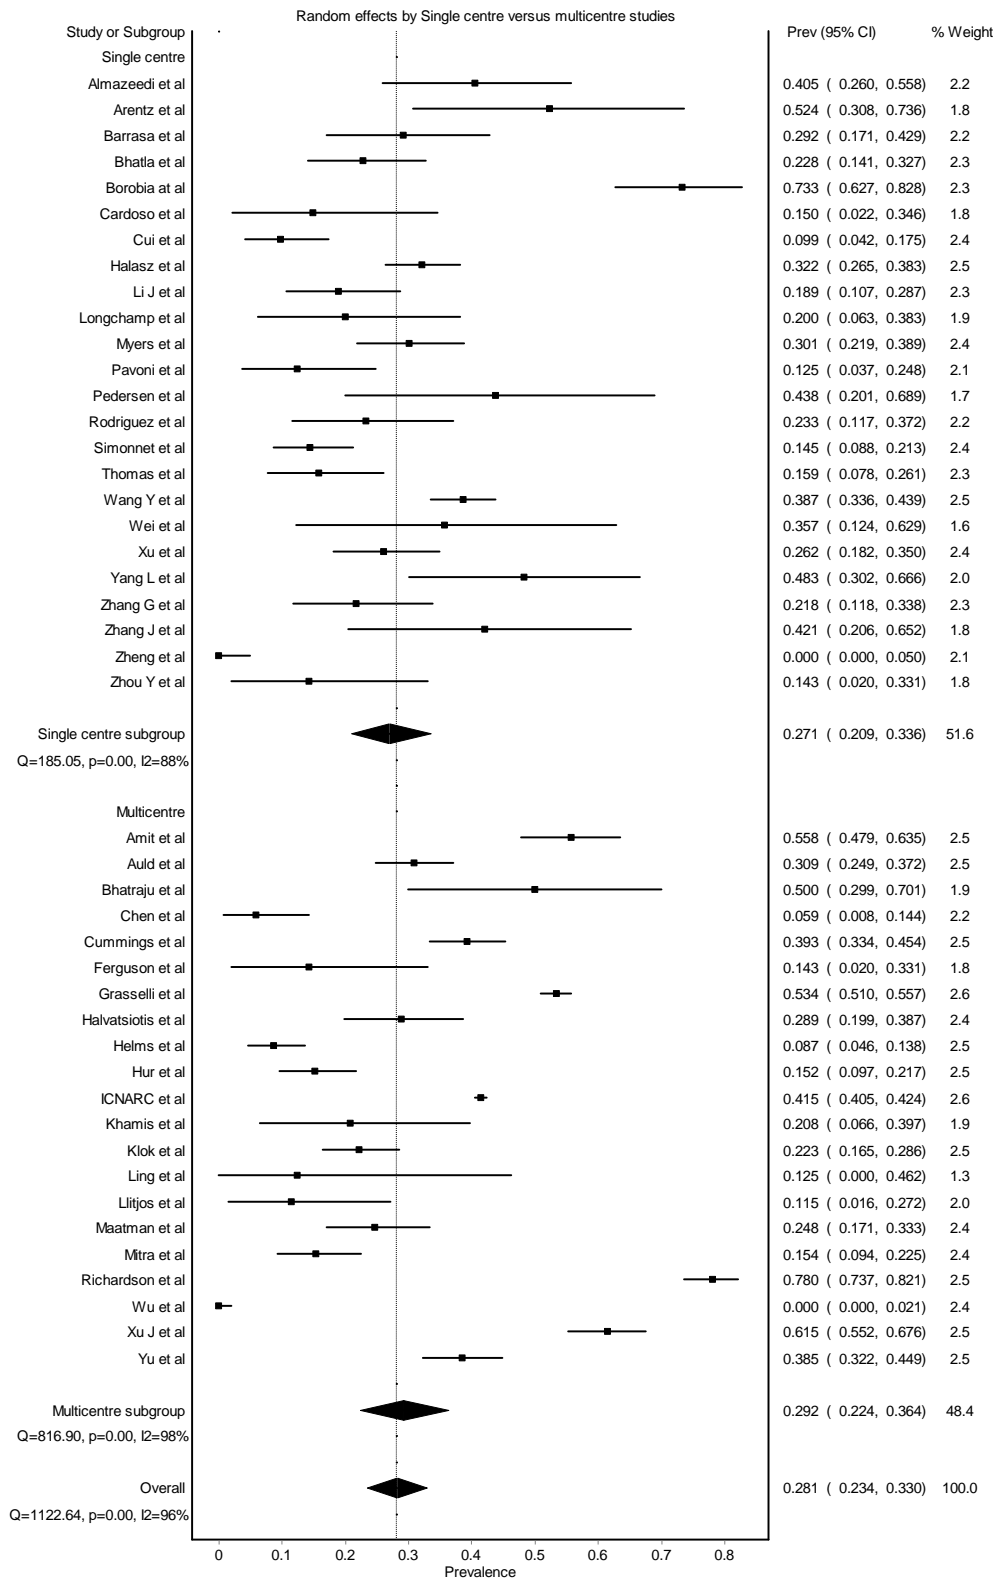

## e-Appendix 14E. Subgroups based on study type (case series versus retrospective cohort versus case control versus prospective cohort versus prospective cross-sectional versus chart review versus national audit)

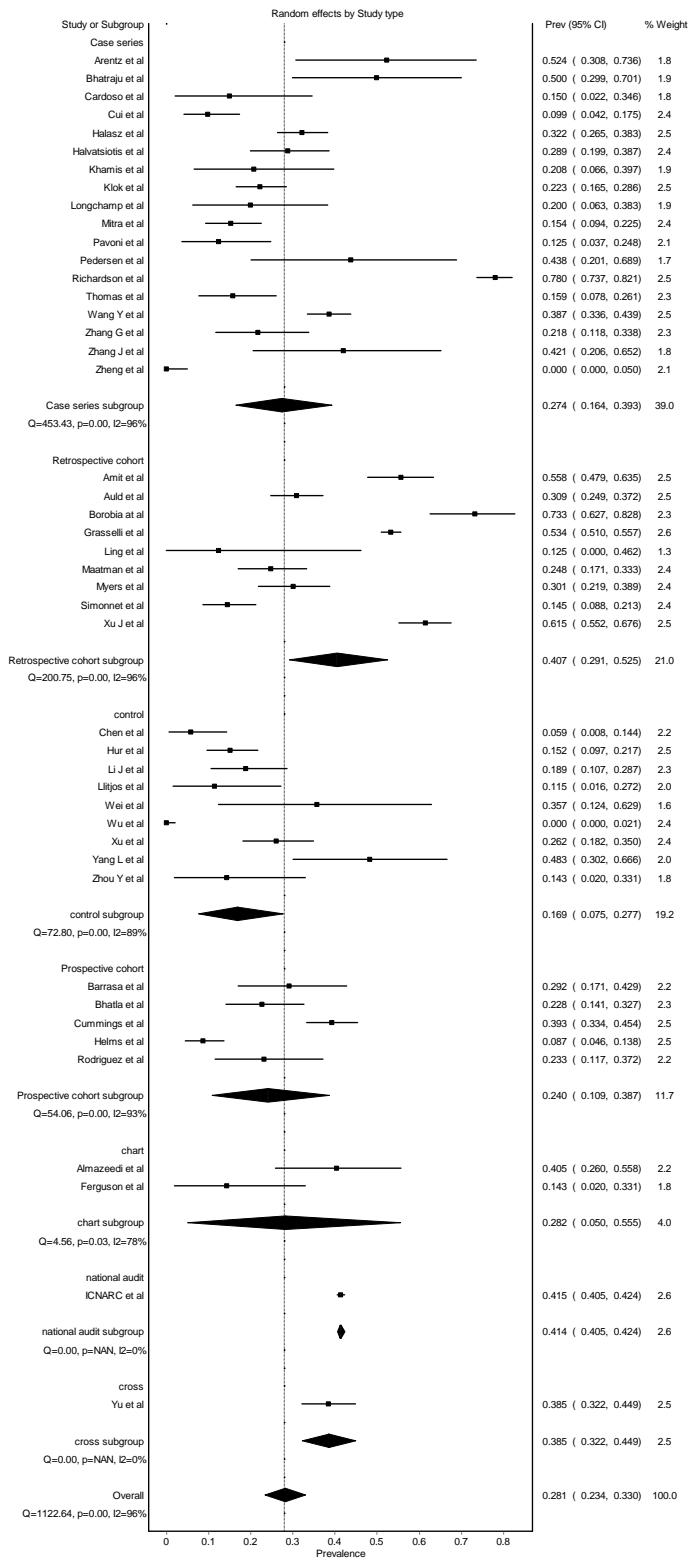

e-Appendix 14F. Subgroup analysis based on study end date (Pre-April 2020 versus post-April 2020)

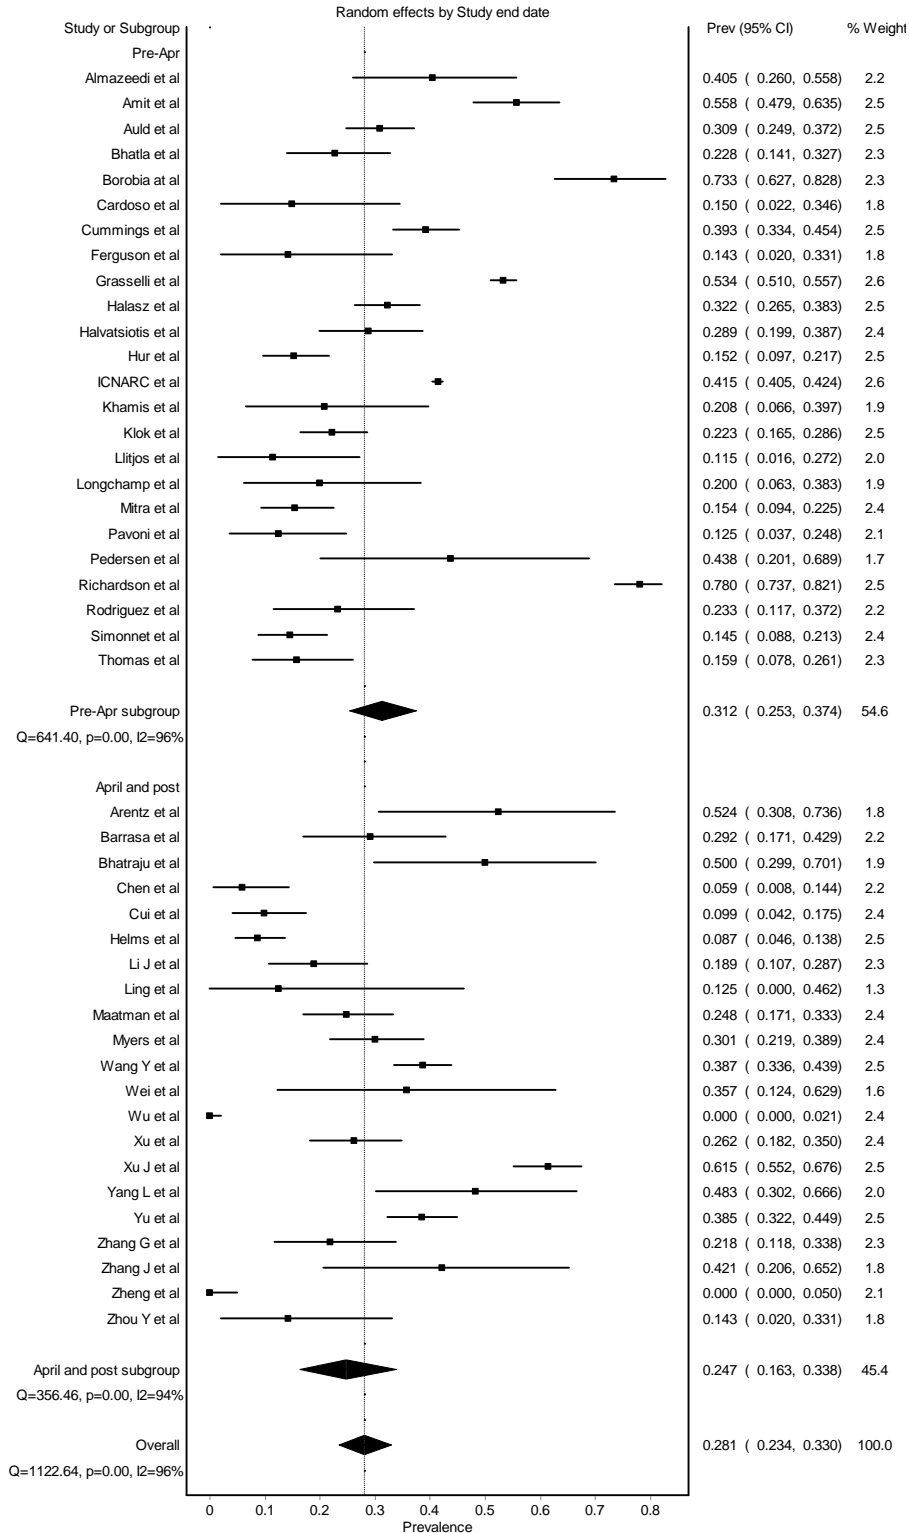

## e-Appendix 14G. Subgroups based on patient disposition – proportion censored at study end date (<20% in-hospital at time of publication versus >20% in hospital)

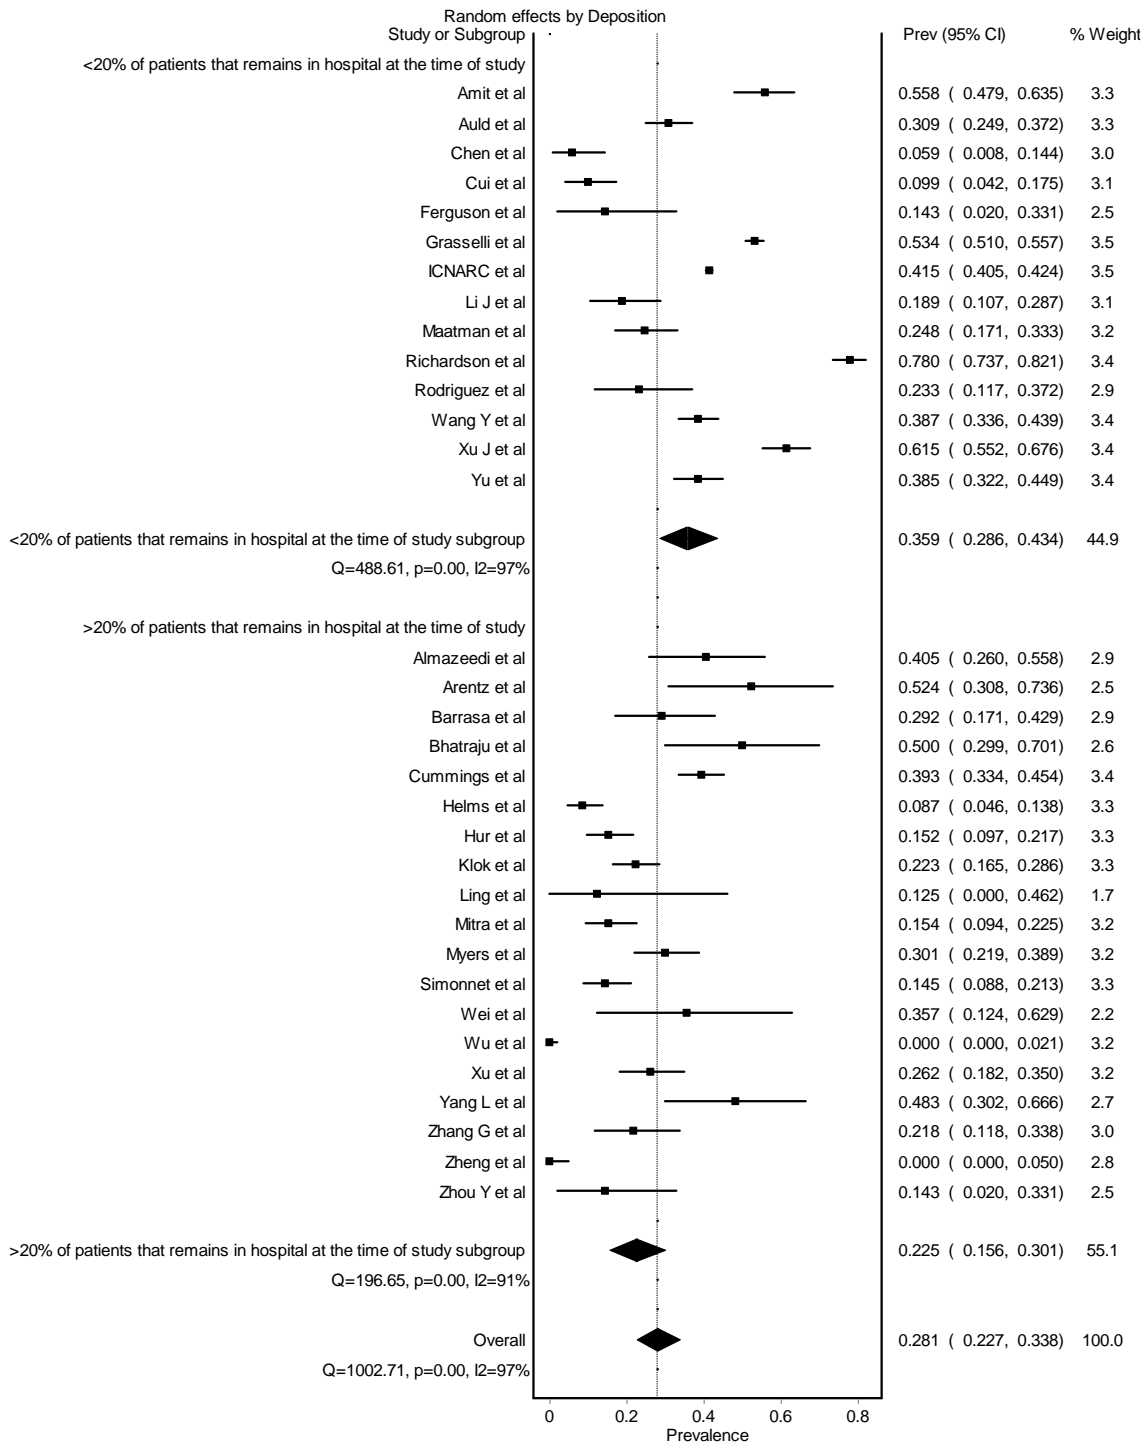

Supplement: mmc1.pdf [file mmc1.pdf]
